# Supplementary material for: A Network Biology Approach Identifies Molecular Cross-Talk between Normal Prostate Epithelial and Prostate Carcinoma Cells
Source: PLoS Comput Biol. 2016 Apr 28;12(4):e1004884. doi: 10.1371/journal.pcbi.1004884 (PMC4849722; doi:10.1371/journal.pcbi.1004884)
Supplement: S3 Table — The excel file is the output of the web based tool DAVID for positively and negatively polarized genes. (XLSX) [file pcbi.1004884.s012.xlsx]

## Sheet: p>0
#	signf	p-value	T	Q	Q&T	Q&T/Q	Q&T/T	term ID	t type	t group	t name	t depth	Q&T list
#
1	!	4.21e-06	6221	204	107	0.525	0.017	GO:0071840	BP	3	cellular component organization or biogenesis	1	32569_AT,1419_G_AT,36443_AT,1775_AT,33865_AT,33876_AT,32542_AT,39797_AT,37049_G_AT,41153_F_AT,1495_AT,1922_G_AT,1742_AT,1793_AT,39175_AT,37042_AT,38736_AT,40089_AT,36577_AT,2057_G_AT,38026_AT,34018_AT,35168_F_AT,484_AT,35177_AT,2066_AT,38644_AT,39099_AT,39145_AT,1652_AT,720_AT,40326_AT,41445_AT,34906_G_AT,39046_AT,41856_AT,34063_AT,32026_S_AT,32242_AT,36283_AT,38863_AT,38526_AT,36149_AT,37981_AT,…
1	!	4.68e-06	11440	204	161	0.789	0.014	GO:0065007	BP	3	biological regulation	1	336_AT,32569_AT,1419_G_AT,1775_AT,33865_AT,33876_AT,32542_AT,39797_AT,37418_AT,41153_F_AT,1495_AT,40527_AT,33520_AT,1922_G_AT,39110_AT,1742_AT,1793_AT,38355_AT,37042_AT,37628_AT,38736_AT,40089_AT,36577_AT,33907_AT,41137_AT,2057_G_AT,38026_AT,31440_AT,35168_F_AT,484_AT,35177_AT,2066_AT,38644_AT,40359_AT,32045_AT,32367_AT,39145_AT,1652_AT,720_AT,40326_AT,40817_AT,41445_AT,34906_G_AT,39046_AT,41856_…
1	!	0.0037	2828	204	56	0.275	0.02	GO:0065009	BP	3	regulation of molecular function	2	336_AT,32569_AT,1419_G_AT,33876_AT,32542_AT,40527_AT,1922_G_AT,1742_AT,37042_AT,41137_AT,2057_G_AT,38026_AT,2066_AT,38644_AT,41445_AT,35112_AT,1709_G_AT,32026_S_AT,32242_AT,33017_AT,38526_AT,33418_AT,36650_AT,37620_AT,39423_F_AT,39511_AT,935_AT,37517_AT,41097_AT,448_S_AT,38062_AT,38725_S_AT,31618_AT,38282_AT,39634_AT,36621_AT,32255_I_AT,755_AT,1469_AT,34507_S_AT,35365_AT,33007_AT,41402_AT,1915_S_…
1	!	8.4e-06	3565	204	73	0.358	0.02	GO:0065008	BP	3	regulation of biological quality	2	336_AT,32569_AT,1419_G_AT,1775_AT,32542_AT,1495_AT,40527_AT,33520_AT,1922_G_AT,37042_AT,38736_AT,36577_AT,38026_AT,484_AT,2066_AT,38644_AT,39145_AT,1652_AT,40326_AT,41445_AT,34906_G_AT,32026_S_AT,38863_AT,33017_AT,38526_AT,37981_AT,40474_R_AT,34457_AT,33418_AT,38230_AT,654_AT,39423_F_AT,35756_AT,40448_AT,39511_AT,35438_AT,935_AT,37517_AT,41097_AT,31775_AT,448_S_AT,33565_AT,1859_S_AT,38725_S_AT,31…
1	!	7.5e-08	13749	204	184	0.902	0.013	GO:0044699	BP	3	single-organism process	1	336_AT,32569_AT,1419_G_AT,36443_AT,40592_AT,1775_AT,33865_AT,33876_AT,39225_AT,32542_AT,39797_AT,37049_G_AT,37418_AT,34849_AT,41153_F_AT,1495_AT,40527_AT,33520_AT,1922_G_AT,39110_AT,1742_AT,1793_AT,40074_AT,38355_AT,39175_AT,37042_AT,37628_AT,38736_AT,36577_AT,33907_AT,33472_AT,41137_AT,2057_G_AT,38026_AT,31440_AT,34018_AT,35168_F_AT,484_AT,36952_AT,35177_AT,2066_AT,38644_AT,41001_AT,40359_AT,390…
1	!	0.0023	1948	204	44	0.216	0.023	GO:0008283	BP	3	cell proliferation	2	32569_AT,1419_G_AT,33865_AT,33876_AT,41153_F_AT,1922_G_AT,1742_AT,1793_AT,2057_G_AT,38026_AT,2066_AT,1652_AT,720_AT,41445_AT,32026_S_AT,33017_AT,38526_AT,37981_AT,32303_AT,654_AT,39346_AT,32410_AT,938_AT,33091_AT,39511_AT,37294_AT,31775_AT,448_S_AT,1859_S_AT,31618_AT,39634_AT,40841_AT,32531_AT,35365_AT,33007_AT,34355_AT,36159_S_AT,39661_S_AT,36423_AT,35324_AT,41382_AT,36805_S_AT,41190_AT,38506_AT
1	!	8.97e-06	6297	204	107	0.525	0.017	GO:0023052	BP	3	signaling	1	336_AT,32569_AT,1419_G_AT,33865_AT,33876_AT,39797_AT,41153_F_AT,1495_AT,40527_AT,33520_AT,1922_G_AT,39110_AT,1742_AT,37042_AT,36577_AT,33907_AT,41137_AT,2057_G_AT,38026_AT,31440_AT,35168_F_AT,484_AT,2066_AT,38644_AT,40359_AT,32045_AT,32367_AT,39145_AT,1652_AT,40326_AT,41445_AT,34906_G_AT,41856_AT,35112_AT,37664_AT,1709_G_AT,32026_S_AT,32242_AT,39263_AT,33017_AT,36762_AT,38526_AT,37981_AT,40474_R_…
1	!	1.9e-05	6288	204	106	0.52	0.017	GO:0044700	BP	3	single organism signaling	2	336_AT,32569_AT,1419_G_AT,33865_AT,33876_AT,39797_AT,41153_F_AT,1495_AT,40527_AT,33520_AT,1922_G_AT,39110_AT,1742_AT,37042_AT,36577_AT,33907_AT,41137_AT,2057_G_AT,38026_AT,31440_AT,35168_F_AT,484_AT,2066_AT,38644_AT,40359_AT,32045_AT,32367_AT,39145_AT,1652_AT,40326_AT,41445_AT,34906_G_AT,41856_AT,35112_AT,37664_AT,1709_G_AT,32026_S_AT,32242_AT,39263_AT,33017_AT,36762_AT,38526_AT,37981_AT,40474_R_…
1	!	0.0348	977	204	26	0.127	0.027	GO:0040007	BP	3	growth	1	32569_AT,33876_AT,32542_AT,37042_AT,2057_G_AT,41445_AT,32242_AT,38526_AT,32410_AT,33091_AT,35438_AT,37294_AT,31618_AT,38282_AT,39634_AT,32531_AT,32263_AT,37360_AT,38711_AT,35365_AT,33891_AT,36423_AT,38443_AT,35324_AT,41382_AT,38506_AT
1	!	0.0187	7114	204	106	0.52	0.015	GO:0032501	BP	3	multicellular organismal process	1	336_AT,32569_AT,1419_G_AT,36443_AT,33876_AT,32542_AT,37418_AT,41153_F_AT,40527_AT,33520_AT,1922_G_AT,1742_AT,1793_AT,37042_AT,37628_AT,38736_AT,41137_AT,2057_G_AT,38026_AT,31440_AT,34018_AT,35168_F_AT,484_AT,2066_AT,38644_AT,41001_AT,100_G_AT,39145_AT,720_AT,40326_AT,41445_AT,41856_AT,35112_AT,32026_S_AT,32242_AT,36283_AT,33017_AT,36762_AT,38526_AT,36149_AT,37981_AT,33418_AT,38230_AT,1782_S_AT,39…
1	!	0.00545	6858	204	105	0.515	0.015	GO:0044707	BP	3	single-multicellular organism process	2	336_AT,32569_AT,1419_G_AT,33876_AT,32542_AT,37418_AT,41153_F_AT,40527_AT,33520_AT,1922_G_AT,1742_AT,1793_AT,37042_AT,37628_AT,38736_AT,41137_AT,2057_G_AT,38026_AT,31440_AT,34018_AT,35168_F_AT,484_AT,2066_AT,38644_AT,41001_AT,100_G_AT,39145_AT,720_AT,40326_AT,41445_AT,41856_AT,35112_AT,32026_S_AT,32242_AT,36283_AT,33017_AT,36762_AT,38526_AT,36149_AT,37981_AT,33418_AT,38230_AT,1782_S_AT,39639_S_AT,…
1	!	0.000193	5851	204	98	0.48	0.017	GO:0032502	BP	3	developmental process	1	336_AT,32569_AT,33876_AT,32542_AT,37418_AT,41153_F_AT,40527_AT,33520_AT,1922_G_AT,1742_AT,1793_AT,37042_AT,37628_AT,38736_AT,36577_AT,2057_G_AT,38026_AT,31440_AT,34018_AT,484_AT,35177_AT,2066_AT,38644_AT,41001_AT,39145_AT,720_AT,40326_AT,41445_AT,41856_AT,35112_AT,32026_S_AT,32242_AT,36283_AT,33017_AT,36762_AT,38526_AT,36149_AT,37981_AT,33418_AT,38230_AT,32303_AT,1782_S_AT,39639_S_AT,32410_AT,404…
1	!	0.000407	5764	204	96	0.471	0.017	GO:0044767	BP	3	single-organism developmental process	2	336_AT,32569_AT,33876_AT,32542_AT,37418_AT,41153_F_AT,40527_AT,33520_AT,1922_G_AT,1742_AT,1793_AT,37042_AT,37628_AT,38736_AT,36577_AT,2057_G_AT,38026_AT,31440_AT,34018_AT,484_AT,2066_AT,38644_AT,41001_AT,39145_AT,720_AT,40326_AT,41445_AT,41856_AT,35112_AT,32026_S_AT,32242_AT,36283_AT,33017_AT,36762_AT,38526_AT,36149_AT,37981_AT,33418_AT,38230_AT,32303_AT,1782_S_AT,39639_S_AT,32410_AT,40448_AT,353…
1	!	0.0105	585	204	20	0.098	0.034	GO:0048589	BP	3	developmental growth	3	32569_AT,33876_AT,2057_G_AT,41445_AT,38526_AT,32410_AT,33091_AT,35438_AT,31618_AT,38282_AT,39634_AT,32531_AT,37360_AT,38711_AT,35365_AT,33891_AT,38443_AT,35324_AT,41382_AT,38506_AT
1	!	1.97e-05	4956	204	90	0.441	0.018	GO:0007275	BP	3	multicellular organismal development	3	336_AT,32569_AT,33876_AT,32542_AT,37418_AT,41153_F_AT,40527_AT,33520_AT,1922_G_AT,1742_AT,1793_AT,37042_AT,37628_AT,38736_AT,2057_G_AT,38026_AT,31440_AT,34018_AT,484_AT,2066_AT,38644_AT,41001_AT,39145_AT,720_AT,40326_AT,41445_AT,41856_AT,35112_AT,32026_S_AT,32242_AT,36283_AT,33017_AT,36762_AT,38526_AT,36149_AT,37981_AT,33418_AT,38230_AT,1782_S_AT,39639_S_AT,32410_AT,40448_AT,33091_AT,41191_AT,395…
1	!	7.72e-05	5171	204	91	0.446	0.018	GO:0048856	BP	3	anatomical structure development	2	336_AT,32569_AT,33876_AT,32542_AT,37418_AT,41153_F_AT,40527_AT,33520_AT,1922_G_AT,1742_AT,1793_AT,37042_AT,37628_AT,38736_AT,36577_AT,2057_G_AT,38026_AT,31440_AT,34018_AT,484_AT,35177_AT,2066_AT,38644_AT,41001_AT,39145_AT,720_AT,40326_AT,41445_AT,41856_AT,35112_AT,32026_S_AT,32242_AT,36283_AT,33017_AT,38526_AT,36149_AT,37981_AT,33418_AT,38230_AT,1782_S_AT,39639_S_AT,32410_AT,40448_AT,35330_AT,330…
1	!	0.000447	4380	204	79	0.387	0.018	GO:0048731	BP	3	system development	3	336_AT,32569_AT,33876_AT,32542_AT,37418_AT,41153_F_AT,40527_AT,33520_AT,1922_G_AT,1742_AT,1793_AT,37042_AT,37628_AT,38736_AT,2057_G_AT,31440_AT,34018_AT,484_AT,2066_AT,41001_AT,39145_AT,720_AT,40326_AT,41445_AT,41856_AT,35112_AT,32026_S_AT,32242_AT,36283_AT,33017_AT,38526_AT,36149_AT,37981_AT,33418_AT,38230_AT,1782_S_AT,32410_AT,40448_AT,33091_AT,41191_AT,39511_AT,35438_AT,935_AT,37517_AT,32239_A…
1	!	0.0133	2363	204	48	0.235	0.02	GO:0007399	BP	3	nervous system development	4	32569_AT,41153_F_AT,1922_G_AT,1742_AT,37628_AT,38736_AT,2057_G_AT,484_AT,2066_AT,41001_AT,39145_AT,40326_AT,41445_AT,41856_AT,35112_AT,32026_S_AT,36283_AT,36149_AT,37981_AT,33418_AT,1782_S_AT,39511_AT,35438_AT,935_AT,37517_AT,32239_AT,32582_AT,448_S_AT,36659_AT,38062_AT,31618_AT,39634_AT,35536_AT,40841_AT,34306_AT,32531_AT,36946_AT,38711_AT,35365_AT,35339_AT,34355_AT,1915_S_AT,38205_AT,36159_S_AT…
1	!	0.00501	712	204	23	0.113	0.032	GO:0060322	BP	3	head development	3	32569_AT,37628_AT,2057_G_AT,484_AT,2066_AT,41001_AT,40326_AT,41445_AT,32026_S_AT,33418_AT,1782_S_AT,39511_AT,35438_AT,448_S_AT,31618_AT,39634_AT,35536_AT,40841_AT,34355_AT,38205_AT,38443_AT,34933_AT,38506_AT
1	!	0.0368	584	204	19	0.093	0.033	GO:0061061	BP	3	muscle structure development	3	32542_AT,41153_F_AT,38736_AT,2057_G_AT,34018_AT,41445_AT,32242_AT,38230_AT,32410_AT,35330_AT,32582_AT,37294_AT,34306_AT,32531_AT,37360_AT,35365_AT,1915_S_AT,36423_AT,41161_AT
1	!	0.00119	3094	204	61	0.299	0.02	GO:0048513	BP	3	organ development	3	32569_AT,33876_AT,32542_AT,37418_AT,41153_F_AT,40527_AT,33520_AT,1742_AT,1793_AT,37042_AT,37628_AT,2057_G_AT,31440_AT,34018_AT,484_AT,2066_AT,41001_AT,720_AT,40326_AT,41445_AT,32026_S_AT,32242_AT,33017_AT,38526_AT,33418_AT,38230_AT,1782_S_AT,32410_AT,40448_AT,33091_AT,41191_AT,39511_AT,35438_AT,32582_AT,31775_AT,448_S_AT,31618_AT,38282_AT,39634_AT,36621_AT,35536_AT,40841_AT,34306_AT,32531_AT,3226…
1	!	0.0232	671	204	21	0.103	0.031	GO:0007420	BP	3	brain development	4	32569_AT,37628_AT,2057_G_AT,484_AT,2066_AT,41001_AT,40326_AT,32026_S_AT,33418_AT,1782_S_AT,39511_AT,35438_AT,448_S_AT,31618_AT,39634_AT,35536_AT,40841_AT,34355_AT,38205_AT,38443_AT,38506_AT
1	!	0.00188	2769	204	56	0.275	0.02	GO:0009653	BP	3	anatomical structure morphogenesis	2	336_AT,32569_AT,33876_AT,32542_AT,41153_F_AT,1922_G_AT,1742_AT,37042_AT,38736_AT,36577_AT,2057_G_AT,38026_AT,484_AT,35177_AT,2066_AT,38644_AT,39145_AT,40326_AT,41445_AT,41856_AT,32026_S_AT,32242_AT,33017_AT,36149_AT,33418_AT,38230_AT,1782_S_AT,32410_AT,33091_AT,41191_AT,39511_AT,35438_AT,935_AT,32239_AT,32582_AT,37294_AT,33565_AT,36659_AT,31618_AT,38282_AT,39634_AT,34306_AT,32531_AT,37360_AT,3871…
1	!	0.0269	15323	204	185	0.907	0.012	GO:0009987	BP	3	cellular process	1	336_AT,32569_AT,1419_G_AT,36443_AT,40592_AT,1775_AT,33865_AT,33876_AT,39225_AT,32542_AT,39797_AT,37049_G_AT,37418_AT,34849_AT,41153_F_AT,1495_AT,40527_AT,33520_AT,1922_G_AT,39110_AT,1742_AT,1793_AT,40074_AT,38355_AT,39175_AT,37042_AT,37628_AT,38736_AT,40089_AT,36577_AT,33907_AT,33472_AT,41137_AT,2057_G_AT,38026_AT,31440_AT,34018_AT,35168_F_AT,484_AT,36952_AT,35177_AT,2066_AT,38644_AT,40359_AT,390…
1	!	6.12e-06	12483	204	170	0.833	0.014	GO:0044763	BP	3	single-organism cellular process	2	336_AT,32569_AT,1419_G_AT,36443_AT,40592_AT,1775_AT,33865_AT,33876_AT,39225_AT,32542_AT,39797_AT,37418_AT,34849_AT,41153_F_AT,1495_AT,40527_AT,33520_AT,1922_G_AT,39110_AT,1742_AT,1793_AT,40074_AT,38355_AT,39175_AT,37042_AT,37628_AT,38736_AT,36577_AT,33907_AT,41137_AT,2057_G_AT,38026_AT,31440_AT,34018_AT,35168_F_AT,484_AT,36952_AT,2066_AT,38644_AT,40359_AT,39099_AT,32045_AT,32367_AT,39145_AT,1652_…
1	!	0.00601	1951	204	43	0.211	0.022	GO:0006928	BP	3	movement of cell or subcellular component	3	32569_AT,36443_AT,41153_F_AT,40527_AT,33520_AT,1922_G_AT,1742_AT,37042_AT,2057_G_AT,38026_AT,2066_AT,39145_AT,41445_AT,41856_AT,32026_S_AT,33017_AT,38526_AT,36149_AT,1782_S_AT,39639_S_AT,41738_AT,35756_AT,35438_AT,935_AT,32239_AT,32582_AT,37294_AT,31775_AT,36659_AT,38282_AT,39634_AT,32531_AT,38711_AT,35365_AT,33891_AT,36159_S_AT,40776_AT,38443_AT,35324_AT,33092_AT,36805_S_AT,32313_AT,348_AT
1	!	2.24e-05	6392	204	107	0.525	0.017	GO:0007154	BP	3	cell communication	3	336_AT,32569_AT,1419_G_AT,33865_AT,33876_AT,39797_AT,41153_F_AT,1495_AT,40527_AT,33520_AT,1922_G_AT,39110_AT,1742_AT,37042_AT,36577_AT,33907_AT,41137_AT,2057_G_AT,38026_AT,31440_AT,35168_F_AT,484_AT,2066_AT,38644_AT,40359_AT,32045_AT,32367_AT,39145_AT,1652_AT,40326_AT,41445_AT,34906_G_AT,41856_AT,35112_AT,37664_AT,1709_G_AT,32026_S_AT,32242_AT,39263_AT,33017_AT,36762_AT,38526_AT,37981_AT,40474_R_…
1	!	0.00397	1721	204	40	0.196	0.023	GO:0007049	BP	3	cell cycle	3	32569_AT,1775_AT,33865_AT,32542_AT,1793_AT,41137_AT,2057_G_AT,2066_AT,1652_AT,41445_AT,34063_AT,38863_AT,527_AT,1782_S_AT,36650_AT,39346_AT,32410_AT,35756_AT,41097_AT,448_S_AT,1859_S_AT,32662_AT,31618_AT,40841_AT,32255_I_AT,32263_AT,36946_AT,37230_AT,1469_AT,38711_AT,37279_AT,35365_AT,35339_AT,35749_AT,36159_S_AT,36423_AT,38443_AT,32749_S_AT,41161_AT,348_AT
1	!	0.01	1027	204	28	0.137	0.027	GO:0000278	BP	3	mitotic cell cycle	4	32569_AT,1775_AT,32542_AT,1793_AT,41137_AT,1652_AT,41445_AT,34063_AT,38863_AT,527_AT,1782_S_AT,39346_AT,448_S_AT,1859_S_AT,32662_AT,31618_AT,32255_I_AT,32263_AT,36946_AT,37230_AT,38711_AT,37279_AT,35339_AT,35749_AT,38443_AT,32749_S_AT,41161_AT,348_AT
1	!	0.00209	1300	204	34	0.167	0.026	GO:0022402	BP	3	cell cycle process	3	32569_AT,1775_AT,32542_AT,1793_AT,41137_AT,1652_AT,41445_AT,34063_AT,38863_AT,527_AT,1782_S_AT,36650_AT,39346_AT,32410_AT,35756_AT,41097_AT,448_S_AT,1859_S_AT,32662_AT,31618_AT,32255_I_AT,32263_AT,37230_AT,1469_AT,38711_AT,37279_AT,35365_AT,35339_AT,35749_AT,36159_S_AT,38443_AT,32749_S_AT,41161_AT,348_AT
1	!	0.0328	856	204	24	0.118	0.028	GO:1903047	BP	3	mitotic cell cycle process	4	32569_AT,1775_AT,32542_AT,1793_AT,41137_AT,1652_AT,41445_AT,34063_AT,527_AT,1782_S_AT,39346_AT,1859_S_AT,32662_AT,31618_AT,32255_I_AT,32263_AT,37230_AT,38711_AT,37279_AT,35339_AT,35749_AT,32749_S_AT,41161_AT,348_AT
1	!	0.00927	4063	204	71	0.348	0.017	GO:0048869	BP	3	cellular developmental process	3	32569_AT,33876_AT,32542_AT,37418_AT,41153_F_AT,1922_G_AT,1742_AT,37042_AT,38736_AT,36577_AT,2057_G_AT,38026_AT,31440_AT,34018_AT,484_AT,2066_AT,38644_AT,39145_AT,720_AT,40326_AT,41445_AT,41856_AT,32026_S_AT,32242_AT,36283_AT,33017_AT,38526_AT,36149_AT,37981_AT,38230_AT,32303_AT,1782_S_AT,39639_S_AT,32410_AT,40448_AT,35330_AT,41191_AT,39511_AT,35438_AT,935_AT,37517_AT,32239_AT,32582_AT,37294_AT,44…
1	!	0.000809	3813	204	71	0.348	0.019	GO:0030154	BP	3	cell differentiation	4	32569_AT,33876_AT,32542_AT,37418_AT,41153_F_AT,1922_G_AT,1742_AT,37042_AT,38736_AT,36577_AT,2057_G_AT,38026_AT,31440_AT,34018_AT,484_AT,2066_AT,38644_AT,39145_AT,720_AT,40326_AT,41445_AT,41856_AT,32026_S_AT,32242_AT,36283_AT,33017_AT,38526_AT,36149_AT,37981_AT,38230_AT,32303_AT,1782_S_AT,39639_S_AT,32410_AT,40448_AT,35330_AT,41191_AT,39511_AT,35438_AT,935_AT,37517_AT,32239_AT,32582_AT,37294_AT,44…
1	!	0.0421	1693	204	37	0.181	0.022	GO:0022008	BP	3	neurogenesis	5	32569_AT,41153_F_AT,1922_G_AT,1742_AT,38736_AT,2057_G_AT,484_AT,2066_AT,39145_AT,40326_AT,41445_AT,41856_AT,32026_S_AT,36283_AT,36149_AT,37981_AT,1782_S_AT,39511_AT,35438_AT,935_AT,37517_AT,32239_AT,32582_AT,36659_AT,31618_AT,39634_AT,40841_AT,32531_AT,38711_AT,35365_AT,35339_AT,34355_AT,38205_AT,36159_S_AT,38443_AT,35324_AT,36805_S_AT
1	!	0.035	1612	204	36	0.176	0.022	GO:0048699	BP	3	generation of neurons	6	32569_AT,41153_F_AT,1922_G_AT,1742_AT,38736_AT,2057_G_AT,484_AT,2066_AT,39145_AT,40326_AT,41445_AT,41856_AT,32026_S_AT,36283_AT,36149_AT,37981_AT,1782_S_AT,39511_AT,35438_AT,935_AT,37517_AT,32239_AT,32582_AT,36659_AT,31618_AT,39634_AT,32531_AT,38711_AT,35365_AT,35339_AT,34355_AT,38205_AT,36159_S_AT,38443_AT,35324_AT,36805_S_AT
1	!	3.63e-06	2183	204	54	0.265	0.025	GO:0048468	BP	3	cell development	4	32569_AT,33876_AT,37418_AT,41153_F_AT,1922_G_AT,1742_AT,38736_AT,36577_AT,2057_G_AT,38026_AT,484_AT,2066_AT,38644_AT,39145_AT,720_AT,41445_AT,41856_AT,32026_S_AT,32242_AT,36283_AT,38526_AT,36149_AT,37981_AT,38230_AT,1782_S_AT,39639_S_AT,32410_AT,35330_AT,41191_AT,39511_AT,35438_AT,935_AT,37517_AT,32239_AT,32582_AT,448_S_AT,36659_AT,31618_AT,38282_AT,39634_AT,32531_AT,38711_AT,37972_AT,35365_AT,35…
1	!	0.000553	1053	204	31	0.152	0.029	GO:0000904	BP	3	cell morphogenesis involved in differentiation	5	32569_AT,33876_AT,1922_G_AT,1742_AT,36577_AT,2057_G_AT,38026_AT,38644_AT,39145_AT,41445_AT,41856_AT,32026_S_AT,36149_AT,1782_S_AT,41191_AT,35438_AT,935_AT,32239_AT,32582_AT,36659_AT,38282_AT,39634_AT,38711_AT,35365_AT,35339_AT,33891_AT,36159_S_AT,38443_AT,35324_AT,32749_S_AT,36805_S_AT
1	!	2.71e-06	6092	204	106	0.52	0.017	GO:0016043	BP	3	cellular component organization	2	32569_AT,1419_G_AT,36443_AT,1775_AT,33865_AT,33876_AT,32542_AT,39797_AT,37049_G_AT,41153_F_AT,1495_AT,1922_G_AT,1742_AT,1793_AT,39175_AT,37042_AT,38736_AT,40089_AT,36577_AT,2057_G_AT,38026_AT,34018_AT,35168_F_AT,484_AT,35177_AT,2066_AT,38644_AT,39099_AT,39145_AT,1652_AT,720_AT,40326_AT,41445_AT,34906_G_AT,39046_AT,41856_AT,34063_AT,32026_S_AT,32242_AT,36283_AT,38863_AT,38526_AT,36149_AT,37981_AT,…
1	!	0.00704	3642	204	66	0.324	0.018	GO:0006996	BP	3	organelle organization	3	32569_AT,1419_G_AT,1775_AT,33865_AT,39797_AT,37049_G_AT,41153_F_AT,1793_AT,39175_AT,38736_AT,40089_AT,484_AT,35177_AT,2066_AT,38644_AT,39099_AT,1652_AT,720_AT,41445_AT,34906_G_AT,39046_AT,34063_AT,32242_AT,36283_AT,38863_AT,36149_AT,37981_AT,527_AT,33418_AT,38230_AT,1782_S_AT,39639_S_AT,37620_AT,938_AT,41191_AT,34203_AT,35438_AT,935_AT,41097_AT,32582_AT,448_S_AT,39370_AT,31618_AT,39634_AT,40841_A…
1	!	0.0373	2601	204	50	0.245	0.019	GO:1902589	BP	3	single-organism organelle organization	4	32569_AT,1775_AT,39797_AT,41153_F_AT,1793_AT,39175_AT,38736_AT,484_AT,2066_AT,39099_AT,1652_AT,720_AT,41445_AT,34906_G_AT,34063_AT,32242_AT,38863_AT,36149_AT,37981_AT,527_AT,1782_S_AT,39639_S_AT,37620_AT,41191_AT,34203_AT,935_AT,41097_AT,32582_AT,448_S_AT,39370_AT,31618_AT,39634_AT,40841_AT,32255_I_AT,32263_AT,37230_AT,38711_AT,37732_AT,37279_AT,35365_AT,35339_AT,34355_AT,38714_AT,35749_AT,32897_…
1	!	1.81e-06	8483	204	133	0.652	0.016	GO:0050896	BP	3	response to stimulus	1	336_AT,32569_AT,1419_G_AT,33865_AT,33876_AT,39797_AT,37418_AT,41153_F_AT,1495_AT,40527_AT,33520_AT,1922_G_AT,39110_AT,1742_AT,39175_AT,37042_AT,37628_AT,38736_AT,36577_AT,33907_AT,41137_AT,2057_G_AT,38026_AT,31440_AT,35168_F_AT,484_AT,36952_AT,2066_AT,38644_AT,40359_AT,32045_AT,32367_AT,39145_AT,1652_AT,40817_AT,41445_AT,34906_G_AT,41856_AT,35112_AT,34063_AT,37664_AT,1709_G_AT,32026_S_AT,32242_AT…
1	!	9.47e-06	4334	204	83	0.407	0.019	GO:0042221	BP	3	response to chemical	2	336_AT,32569_AT,1419_G_AT,33876_AT,39797_AT,41153_F_AT,1495_AT,40527_AT,33520_AT,1922_G_AT,39110_AT,1742_AT,37042_AT,37628_AT,36577_AT,33907_AT,2057_G_AT,31440_AT,35168_F_AT,484_AT,36952_AT,2066_AT,38644_AT,39145_AT,40817_AT,41445_AT,34906_G_AT,41856_AT,35112_AT,32026_S_AT,32242_AT,39263_AT,33017_AT,36762_AT,38526_AT,36149_AT,40474_R_AT,34457_AT,38230_AT,32303_AT,32410_AT,35756_AT,938_AT,35438_AT…
1	!	0.0033	1027	204	29	0.142	0.028	GO:1901698	BP	3	response to nitrogen compound	3	39797_AT,41153_F_AT,40527_AT,33520_AT,1922_G_AT,39110_AT,1742_AT,2057_G_AT,35168_F_AT,36952_AT,2066_AT,38644_AT,32026_S_AT,33017_AT,36762_AT,38526_AT,37294_AT,448_S_AT,37606_AT,39634_AT,36621_AT,35263_AT,32531_AT,35339_AT,1915_S_AT,32897_AT,38443_AT,648_AT,36805_S_AT
1	!	4.62e-05	1574	204	42	0.206	0.027	GO:1901700	BP	3	response to oxygen-containing compound	3	336_AT,1419_G_AT,39797_AT,41153_F_AT,40527_AT,33520_AT,1922_G_AT,39110_AT,1742_AT,37042_AT,37628_AT,2057_G_AT,35168_F_AT,484_AT,36952_AT,2066_AT,38644_AT,41445_AT,34906_G_AT,32026_S_AT,32242_AT,33017_AT,38526_AT,32410_AT,37294_AT,448_S_AT,37606_AT,39634_AT,36621_AT,35263_AT,32531_AT,1469_AT,32000_G_AT,35339_AT,1915_S_AT,32897_AT,38443_AT,35324_AT,648_AT,36805_S_AT,41190_AT,38506_AT
1	!	8e-06	2912	204	64	0.314	0.022	GO:0010033	BP	3	response to organic substance	3	336_AT,32569_AT,1419_G_AT,33876_AT,39797_AT,41153_F_AT,1495_AT,40527_AT,33520_AT,1922_G_AT,39110_AT,1742_AT,37042_AT,37628_AT,36577_AT,33907_AT,2057_G_AT,31440_AT,35168_F_AT,484_AT,36952_AT,2066_AT,38644_AT,41445_AT,34906_G_AT,35112_AT,32026_S_AT,32242_AT,39263_AT,33017_AT,36762_AT,38526_AT,36149_AT,40474_R_AT,32303_AT,32410_AT,35756_AT,938_AT,37294_AT,448_S_AT,33565_AT,36659_AT,1859_S_AT,37606_A…
1	!	0.0184	408	204	16	0.078	0.039	GO:0042493	BP	3	response to drug	3	336_AT,1419_G_AT,40527_AT,37628_AT,484_AT,36952_AT,2066_AT,41445_AT,33017_AT,31618_AT,32255_I_AT,1915_S_AT,36159_S_AT,32897_AT,36805_S_AT,38506_AT
1	!	2.6e-07	1667	204	48	0.235	0.029	GO:0009719	BP	3	response to endogenous stimulus	2	33876_AT,39797_AT,41153_F_AT,1495_AT,40527_AT,33520_AT,1922_G_AT,39110_AT,1742_AT,37042_AT,37628_AT,36577_AT,2057_G_AT,35168_F_AT,484_AT,36952_AT,2066_AT,38644_AT,41445_AT,35112_AT,32026_S_AT,32242_AT,33017_AT,36762_AT,38526_AT,32410_AT,35756_AT,37294_AT,448_S_AT,33565_AT,36659_AT,1859_S_AT,37606_AT,31618_AT,39634_AT,36621_AT,35263_AT,755_AT,32531_AT,32000_G_AT,35365_AT,35339_AT,1915_S_AT,32897_A…
1	!	9.68e-05	1255	204	36	0.176	0.029	GO:0071495	BP	3	cellular response to endogenous stimulus	3	33876_AT,39797_AT,41153_F_AT,1495_AT,40527_AT,1922_G_AT,39110_AT,1742_AT,37042_AT,36577_AT,2057_G_AT,35168_F_AT,484_AT,38644_AT,41445_AT,32026_S_AT,33017_AT,36762_AT,38526_AT,32410_AT,35756_AT,448_S_AT,36659_AT,1859_S_AT,31618_AT,39634_AT,36621_AT,35263_AT,755_AT,35365_AT,35339_AT,1915_S_AT,38443_AT,35324_AT,648_AT,36805_S_AT
1	!	0.00109	1029	204	30	0.147	0.029	GO:0009725	BP	3	response to hormone	3	41153_F_AT,33520_AT,1922_G_AT,39110_AT,1742_AT,37628_AT,2057_G_AT,484_AT,36952_AT,2066_AT,38644_AT,41445_AT,35112_AT,32026_S_AT,32242_AT,33017_AT,32410_AT,37294_AT,448_S_AT,33565_AT,37606_AT,39634_AT,36621_AT,35263_AT,32531_AT,35339_AT,1915_S_AT,38443_AT,35324_AT,648_AT
1	!	0.000591	944	204	29	0.142	0.031	GO:0010243	BP	3	response to organonitrogen compound	3	39797_AT,41153_F_AT,40527_AT,33520_AT,1922_G_AT,39110_AT,1742_AT,2057_G_AT,35168_F_AT,36952_AT,2066_AT,38644_AT,32026_S_AT,33017_AT,36762_AT,38526_AT,37294_AT,448_S_AT,37606_AT,39634_AT,36621_AT,35263_AT,32531_AT,35339_AT,1915_S_AT,32897_AT,38443_AT,648_AT,36805_S_AT
1	!	0.00141	4023	204	73	0.358	0.018	GO:0006950	BP	3	response to stress	2	336_AT,32569_AT,1419_G_AT,33865_AT,41153_F_AT,40527_AT,33520_AT,1922_G_AT,1742_AT,39175_AT,37042_AT,38736_AT,2057_G_AT,38026_AT,2066_AT,38644_AT,32367_AT,39145_AT,41445_AT,34063_AT,1709_G_AT,32026_S_AT,32242_AT,39263_AT,38863_AT,36149_AT,33418_AT,38230_AT,39639_S_AT,39423_F_AT,32410_AT,760_AT,40448_AT,935_AT,33756_AT,32239_AT,41097_AT,32582_AT,37294_AT,31775_AT,448_S_AT,1859_S_AT,32662_AT,39370_A…
1	!	0.00522	1051	204	29	0.142	0.028	GO:0009611	BP	3	response to wounding	3	336_AT,1419_G_AT,41153_F_AT,33520_AT,1742_AT,37042_AT,38736_AT,38026_AT,2066_AT,39145_AT,41445_AT,36149_AT,32410_AT,40448_AT,935_AT,32239_AT,31618_AT,38282_AT,39634_AT,36621_AT,755_AT,32531_AT,38711_AT,35365_AT,38443_AT,32749_S_AT,36805_S_AT,348_AT,35598_AT
1	!	0.013	2504	204	50	0.245	0.02	GO:0009605	BP	3	response to external stimulus	2	336_AT,1419_G_AT,40527_AT,33520_AT,1922_G_AT,1742_AT,37042_AT,37628_AT,2057_G_AT,484_AT,39145_AT,1652_AT,41445_AT,41856_AT,35112_AT,32026_S_AT,39263_AT,38526_AT,36149_AT,33418_AT,1782_S_AT,40448_AT,35438_AT,935_AT,32239_AT,32582_AT,31775_AT,33565_AT,36659_AT,39370_AT,31618_AT,39634_AT,36621_AT,32531_AT,1469_AT,38711_AT,34467_G_AT,32000_G_AT,34355_AT,1915_S_AT,36159_S_AT,32897_AT,38443_AT,35324_AT…
1	!	1e-06	7129	204	119	0.583	0.017	GO:0051716	BP	3	cellular response to stimulus	2	336_AT,32569_AT,1419_G_AT,33865_AT,33876_AT,39797_AT,41153_F_AT,1495_AT,40527_AT,33520_AT,1922_G_AT,39110_AT,1742_AT,39175_AT,37042_AT,37628_AT,36577_AT,33907_AT,41137_AT,2057_G_AT,38026_AT,31440_AT,35168_F_AT,484_AT,2066_AT,38644_AT,40359_AT,32045_AT,32367_AT,39145_AT,1652_AT,41445_AT,34906_G_AT,41856_AT,35112_AT,34063_AT,37664_AT,1709_G_AT,32026_S_AT,32242_AT,39263_AT,38863_AT,33017_AT,36762_AT…
1	!	2.08e-05	2771	204	61	0.299	0.022	GO:0070887	BP	3	cellular response to chemical stimulus	3	32569_AT,1419_G_AT,33876_AT,39797_AT,41153_F_AT,1495_AT,40527_AT,33520_AT,1922_G_AT,39110_AT,1742_AT,37042_AT,37628_AT,36577_AT,33907_AT,2057_G_AT,31440_AT,35168_F_AT,484_AT,2066_AT,38644_AT,41445_AT,34906_G_AT,32026_S_AT,39263_AT,33017_AT,36762_AT,38526_AT,36149_AT,40474_R_AT,38230_AT,32303_AT,32410_AT,35756_AT,938_AT,33756_AT,31775_AT,448_S_AT,36659_AT,1859_S_AT,31618_AT,39634_AT,36621_AT,35263…
1	!	0.00013	2283	204	52	0.255	0.023	GO:0071310	BP	3	cellular response to organic substance	4	32569_AT,1419_G_AT,33876_AT,39797_AT,41153_F_AT,1495_AT,40527_AT,1922_G_AT,39110_AT,1742_AT,37042_AT,36577_AT,33907_AT,2057_G_AT,31440_AT,35168_F_AT,484_AT,2066_AT,38644_AT,41445_AT,34906_G_AT,32026_S_AT,39263_AT,33017_AT,36762_AT,38526_AT,36149_AT,40474_R_AT,32303_AT,32410_AT,35756_AT,938_AT,448_S_AT,36659_AT,1859_S_AT,31618_AT,39634_AT,36621_AT,35263_AT,755_AT,1469_AT,32000_G_AT,35365_AT,35339_…
1	!	0.0487	650	204	20	0.098	0.031	GO:0071417	BP	3	cellular response to organonitrogen compound	5	39797_AT,41153_F_AT,40527_AT,1922_G_AT,39110_AT,1742_AT,2057_G_AT,35168_F_AT,38644_AT,32026_S_AT,33017_AT,36762_AT,38526_AT,448_S_AT,39634_AT,36621_AT,35263_AT,35339_AT,38443_AT,36805_S_AT
1	!	2.25e-06	10925	204	157	0.77	0.014	GO:0050789	BP	3	regulation of biological process	1	336_AT,32569_AT,1419_G_AT,33865_AT,33876_AT,32542_AT,39797_AT,37418_AT,41153_F_AT,1495_AT,40527_AT,33520_AT,1922_G_AT,39110_AT,1742_AT,1793_AT,38355_AT,37042_AT,37628_AT,38736_AT,40089_AT,36577_AT,33907_AT,41137_AT,2057_G_AT,38026_AT,31440_AT,35168_F_AT,484_AT,35177_AT,2066_AT,38644_AT,40359_AT,32045_AT,32367_AT,39145_AT,1652_AT,720_AT,40326_AT,40817_AT,41445_AT,34906_G_AT,39046_AT,41856_AT,35112…
1	!	0.000127	2486	204	55	0.27	0.022	GO:0051239	BP	3	regulation of multicellular organismal process	2	336_AT,32569_AT,1419_G_AT,33876_AT,41153_F_AT,40527_AT,33520_AT,37042_AT,38736_AT,41137_AT,2057_G_AT,38026_AT,484_AT,2066_AT,39145_AT,40326_AT,41445_AT,32026_S_AT,36283_AT,33017_AT,38526_AT,36149_AT,37981_AT,38230_AT,32410_AT,40448_AT,33091_AT,34203_AT,39511_AT,35438_AT,37517_AT,37294_AT,31775_AT,448_S_AT,36659_AT,31618_AT,39634_AT,36621_AT,32531_AT,1469_AT,38711_AT,35365_AT,34355_AT,1915_S_AT,38…
1	!	0.00862	3663	204	66	0.324	0.018	GO:0048583	BP	3	regulation of response to stimulus	2	32569_AT,33865_AT,33876_AT,39797_AT,41153_F_AT,1495_AT,40527_AT,33520_AT,1922_G_AT,1742_AT,37042_AT,2057_G_AT,38026_AT,484_AT,2066_AT,38644_AT,1652_AT,41445_AT,41856_AT,35112_AT,1709_G_AT,32026_S_AT,33017_AT,38526_AT,33418_AT,39423_F_AT,39346_AT,32410_AT,35756_AT,40448_AT,35438_AT,37680_AT,37517_AT,41097_AT,31775_AT,448_S_AT,1859_S_AT,39370_AT,31618_AT,39634_AT,36621_AT,755_AT,32531_AT,1276_G_AT,…
1	!	4.39e-05	5444	204	95	0.466	0.017	GO:0048518	BP	3	positive regulation of biological process	2	336_AT,32569_AT,1419_G_AT,33876_AT,32542_AT,37418_AT,41153_F_AT,40527_AT,33520_AT,1922_G_AT,1742_AT,1793_AT,37042_AT,37628_AT,38736_AT,41137_AT,2057_G_AT,38026_AT,35168_F_AT,484_AT,35177_AT,2066_AT,38644_AT,1652_AT,720_AT,40326_AT,41445_AT,34906_G_AT,41856_AT,35112_AT,1709_G_AT,32026_S_AT,33017_AT,38526_AT,36149_AT,40474_R_AT,34457_AT,33418_AT,38230_AT,1782_S_AT,36650_AT,37620_AT,39423_F_AT,39346…
1	!	0.0377	2028	204	42	0.206	0.021	GO:0048584	BP	3	positive regulation of response to stimulus	3	32569_AT,41153_F_AT,33520_AT,1922_G_AT,1742_AT,37042_AT,2057_G_AT,2066_AT,38644_AT,1652_AT,41445_AT,41856_AT,1709_G_AT,32026_S_AT,33017_AT,38526_AT,33418_AT,39423_F_AT,39346_AT,32410_AT,35756_AT,37680_AT,448_S_AT,31618_AT,39634_AT,755_AT,32531_AT,1276_G_AT,1469_AT,35365_AT,33007_AT,1915_S_AT,38205_AT,36159_S_AT,39700_AT,38443_AT,41382_AT,32749_S_AT,36805_S_AT,41161_AT,37968_AT,41190_AT
1	!	0.0234	4572	204	76	0.373	0.017	GO:0048519	BP	3	negative regulation of biological process	2	32569_AT,1419_G_AT,33865_AT,33876_AT,32542_AT,39797_AT,41153_F_AT,1495_AT,40527_AT,1742_AT,37042_AT,37628_AT,2057_G_AT,38026_AT,2066_AT,1652_AT,720_AT,41445_AT,39046_AT,41856_AT,35112_AT,34063_AT,32026_S_AT,32242_AT,36283_AT,33017_AT,38526_AT,36149_AT,32303_AT,1782_S_AT,39639_S_AT,654_AT,39423_F_AT,39346_AT,32410_AT,35756_AT,760_AT,40448_AT,35438_AT,37517_AT,41097_AT,37294_AT,31775_AT,448_S_AT,36…
1	!	0.000539	2953	204	60	0.294	0.02	GO:0023051	BP	3	regulation of signaling	2	32569_AT,1419_G_AT,33865_AT,33876_AT,39797_AT,41153_F_AT,1495_AT,33520_AT,1922_G_AT,1742_AT,37042_AT,2057_G_AT,38026_AT,484_AT,2066_AT,38644_AT,1652_AT,41445_AT,34906_G_AT,41856_AT,35112_AT,1709_G_AT,32026_S_AT,33017_AT,38526_AT,37981_AT,33418_AT,39423_F_AT,39346_AT,35756_AT,37680_AT,37517_AT,448_S_AT,1859_S_AT,31618_AT,39634_AT,36621_AT,35263_AT,755_AT,32531_AT,1276_G_AT,36946_AT,1469_AT,34507_S…
1	!	0.000121	6750	204	109	0.534	0.016	GO:0019222	BP	3	regulation of metabolic process	2	336_AT,32569_AT,1419_G_AT,33865_AT,33876_AT,39797_AT,37418_AT,40527_AT,1922_G_AT,39110_AT,1742_AT,1793_AT,38355_AT,37042_AT,37628_AT,40089_AT,33907_AT,41137_AT,2057_G_AT,38026_AT,31440_AT,484_AT,2066_AT,38644_AT,1652_AT,720_AT,41445_AT,39046_AT,35112_AT,34063_AT,1709_G_AT,32026_S_AT,32242_AT,36283_AT,33017_AT,38526_AT,40474_R_AT,33418_AT,38230_AT,32303_AT,39639_S_AT,36650_AT,654_AT,37620_AT,37318…
1	!	0.0469	5836	204	90	0.441	0.015	GO:0080090	BP	3	regulation of primary metabolic process	3	32569_AT,1419_G_AT,33865_AT,33876_AT,39797_AT,37418_AT,1922_G_AT,39110_AT,1742_AT,1793_AT,37042_AT,37628_AT,40089_AT,33907_AT,2057_G_AT,38026_AT,31440_AT,484_AT,2066_AT,38644_AT,1652_AT,720_AT,41445_AT,39046_AT,34063_AT,1709_G_AT,32026_S_AT,32242_AT,36283_AT,33017_AT,38526_AT,40474_R_AT,33418_AT,38230_AT,32303_AT,39639_S_AT,36650_AT,654_AT,37620_AT,37318_AT,39423_F_AT,39346_AT,32410_AT,35756_AT,7…
1	!	0.0129	3550	204	64	0.314	0.018	GO:0009893	BP	3	positive regulation of metabolic process	3	336_AT,1419_G_AT,33876_AT,37418_AT,1922_G_AT,1742_AT,37042_AT,37628_AT,41137_AT,2057_G_AT,38026_AT,484_AT,2066_AT,38644_AT,1652_AT,720_AT,41445_AT,35112_AT,1709_G_AT,32026_S_AT,33017_AT,33418_AT,38230_AT,36650_AT,37620_AT,39346_AT,32410_AT,760_AT,40448_AT,33091_AT,39511_AT,37680_AT,935_AT,37517_AT,41097_AT,448_S_AT,1859_S_AT,38062_AT,31618_AT,755_AT,32531_AT,1276_G_AT,36946_AT,1469_AT,32000_G_AT,…
1	!	0.000135	10362	204	147	0.721	0.014	GO:0050794	BP	3	regulation of cellular process	2	336_AT,32569_AT,1419_G_AT,33865_AT,33876_AT,32542_AT,39797_AT,37418_AT,41153_F_AT,1495_AT,40527_AT,33520_AT,1922_G_AT,39110_AT,1742_AT,1793_AT,37042_AT,37628_AT,38736_AT,40089_AT,36577_AT,33907_AT,41137_AT,2057_G_AT,38026_AT,31440_AT,35168_F_AT,484_AT,35177_AT,2066_AT,38644_AT,40359_AT,32045_AT,32367_AT,39145_AT,1652_AT,720_AT,40326_AT,40817_AT,41445_AT,34906_G_AT,39046_AT,41856_AT,35112_AT,34063…
1	!	0.00179	4685	204	81	0.397	0.017	GO:0048522	BP	3	positive regulation of cellular process	3	32569_AT,1419_G_AT,33876_AT,37418_AT,41153_F_AT,40527_AT,33520_AT,1922_G_AT,1742_AT,1793_AT,37042_AT,37628_AT,38736_AT,2057_G_AT,38026_AT,35168_F_AT,484_AT,35177_AT,2066_AT,38644_AT,1652_AT,720_AT,40326_AT,41445_AT,34906_G_AT,41856_AT,1709_G_AT,32026_S_AT,33017_AT,38526_AT,36149_AT,40474_R_AT,33418_AT,38230_AT,1782_S_AT,36650_AT,37620_AT,39423_F_AT,39346_AT,32410_AT,35756_AT,938_AT,760_AT,40448_A…
1	!	0.00759	4200	204	73	0.358	0.017	GO:0048523	BP	3	negative regulation of cellular process	3	32569_AT,33865_AT,33876_AT,32542_AT,39797_AT,41153_F_AT,1495_AT,40527_AT,1742_AT,37042_AT,37628_AT,2057_G_AT,38026_AT,2066_AT,1652_AT,720_AT,41445_AT,39046_AT,41856_AT,35112_AT,34063_AT,32026_S_AT,32242_AT,36283_AT,33017_AT,38526_AT,36149_AT,32303_AT,1782_S_AT,39639_S_AT,654_AT,39423_F_AT,39346_AT,32410_AT,35756_AT,760_AT,40448_AT,35438_AT,37517_AT,41097_AT,37294_AT,31775_AT,448_S_AT,1859_S_AT,32…
1	!	0.0115	641	204	21	0.103	0.033	GO:0008285	BP	3	negative regulation of cell proliferation	4	41153_F_AT,38026_AT,2066_AT,1652_AT,41445_AT,32026_S_AT,33017_AT,32303_AT,654_AT,32410_AT,37294_AT,31775_AT,448_S_AT,31618_AT,39634_AT,32531_AT,35365_AT,36159_S_AT,36423_AT,35324_AT,36805_S_AT
1	!	0.000104	2134	204	50	0.245	0.023	GO:0051128	BP	3	regulation of cellular component organization	3	32569_AT,33876_AT,32542_AT,1793_AT,37042_AT,38736_AT,36577_AT,2057_G_AT,38026_AT,35168_F_AT,35177_AT,2066_AT,38644_AT,40326_AT,41445_AT,34906_G_AT,32026_S_AT,32242_AT,36149_AT,37981_AT,33418_AT,1782_S_AT,37318_AT,32410_AT,938_AT,35438_AT,37517_AT,41097_AT,37294_AT,31775_AT,39370_AT,31618_AT,38282_AT,39634_AT,36621_AT,32255_I_AT,32531_AT,38711_AT,35365_AT,34355_AT,33891_AT,35749_AT,38205_AT,32897_…
1	!	0.0103	1088	204	29	0.142	0.027	GO:0051130	BP	3	positive regulation of cellular component organization	4	32569_AT,33876_AT,38736_AT,2057_G_AT,35168_F_AT,35177_AT,2066_AT,40326_AT,41445_AT,32026_S_AT,36149_AT,33418_AT,32410_AT,938_AT,35438_AT,41097_AT,31775_AT,31618_AT,39634_AT,36621_AT,32255_I_AT,38711_AT,35365_AT,34355_AT,38205_AT,32749_S_AT,36805_S_AT,41161_AT,38506_AT
1	!	0.0436	5912	204	91	0.446	0.015	GO:0031323	BP	3	regulation of cellular metabolic process	3	32569_AT,1419_G_AT,33865_AT,33876_AT,39797_AT,37418_AT,1922_G_AT,39110_AT,1742_AT,1793_AT,37042_AT,37628_AT,40089_AT,33907_AT,2057_G_AT,38026_AT,31440_AT,484_AT,2066_AT,38644_AT,1652_AT,720_AT,41445_AT,39046_AT,34063_AT,1709_G_AT,32026_S_AT,32242_AT,36283_AT,33017_AT,38526_AT,40474_R_AT,33418_AT,38230_AT,32303_AT,39639_S_AT,36650_AT,654_AT,37620_AT,37318_AT,39423_F_AT,39346_AT,32410_AT,35756_AT,7…
1	!	0.036	4218	204	71	0.348	0.017	GO:0031326	BP	3	regulation of cellular biosynthetic process	4	1419_G_AT,33865_AT,33876_AT,39797_AT,37418_AT,39110_AT,1793_AT,37042_AT,40089_AT,33907_AT,2057_G_AT,31440_AT,484_AT,1652_AT,720_AT,41445_AT,39046_AT,34063_AT,1709_G_AT,32026_S_AT,36283_AT,33017_AT,33418_AT,38230_AT,32303_AT,39639_S_AT,654_AT,37620_AT,37318_AT,39423_F_AT,39346_AT,32410_AT,760_AT,40448_AT,33091_AT,37680_AT,935_AT,41097_AT,37294_AT,31775_AT,448_S_AT,1859_S_AT,31618_AT,32255_I_AT,352…
1	!	0.000915	2998	204	60	0.294	0.02	GO:0010646	BP	3	regulation of cell communication	3	32569_AT,1419_G_AT,33865_AT,33876_AT,39797_AT,41153_F_AT,1495_AT,33520_AT,1922_G_AT,1742_AT,37042_AT,2057_G_AT,38026_AT,484_AT,2066_AT,38644_AT,1652_AT,41445_AT,34906_G_AT,41856_AT,35112_AT,1709_G_AT,32026_S_AT,33017_AT,38526_AT,37981_AT,33418_AT,39423_F_AT,39346_AT,35756_AT,37680_AT,37517_AT,448_S_AT,1859_S_AT,39370_AT,31618_AT,39634_AT,36621_AT,35263_AT,755_AT,32531_AT,1276_G_AT,36946_AT,1469_A…
1	!	2.98e-05	5823	204	100	0.49	0.017	GO:0007165	BP	3	signal transduction	3	336_AT,32569_AT,1419_G_AT,33865_AT,33876_AT,39797_AT,41153_F_AT,1495_AT,33520_AT,1922_G_AT,39110_AT,1742_AT,37042_AT,36577_AT,33907_AT,41137_AT,2057_G_AT,38026_AT,31440_AT,35168_F_AT,484_AT,2066_AT,38644_AT,40359_AT,32045_AT,32367_AT,39145_AT,1652_AT,41445_AT,34906_G_AT,41856_AT,35112_AT,37664_AT,1709_G_AT,32026_S_AT,32242_AT,39263_AT,33017_AT,36762_AT,38526_AT,40474_R_AT,527_AT,38230_AT,1782_S_A…
1	!	0.00017	2788	204	59	0.289	0.021	GO:0007166	BP	3	cell surface receptor signaling pathway	4	32569_AT,33865_AT,33876_AT,41153_F_AT,1495_AT,33520_AT,1922_G_AT,39110_AT,1742_AT,37042_AT,36577_AT,33907_AT,2057_G_AT,31440_AT,35168_F_AT,2066_AT,38644_AT,32367_AT,39145_AT,41445_AT,34906_G_AT,41856_AT,1709_G_AT,32026_S_AT,39263_AT,33017_AT,38526_AT,40474_R_AT,39346_AT,35756_AT,938_AT,760_AT,35438_AT,32582_AT,448_S_AT,1859_S_AT,31618_AT,38221_AT,38282_AT,39634_AT,36621_AT,35263_AT,755_AT,1276_G_…
1	!	0.023	98	204	8	0.039	0.082	GO:0007229	BP	3	integrin-mediated signaling pathway	5	41153_F_AT,36577_AT,35168_F_AT,38644_AT,38282_AT,35365_AT,38443_AT,32749_S_AT
1	!	5.92e-07	2734	204	64	0.314	0.023	GO:0035556	BP	3	intracellular signal transduction	4	336_AT,32569_AT,1419_G_AT,33865_AT,33876_AT,39797_AT,41153_F_AT,33520_AT,1922_G_AT,1742_AT,37042_AT,41137_AT,2057_G_AT,38026_AT,2066_AT,38644_AT,39145_AT,1652_AT,41445_AT,41856_AT,35112_AT,1709_G_AT,32026_S_AT,32242_AT,38526_AT,527_AT,1782_S_AT,39423_F_AT,760_AT,40448_AT,37680_AT,37517_AT,32582_AT,448_S_AT,1859_S_AT,38062_AT,31618_AT,38221_AT,38282_AT,39634_AT,35263_AT,755_AT,32531_AT,36946_AT,14…
1	!	0.0167	937	204	26	0.127	0.028	GO:0007264	BP	3	small GTPase mediated signal transduction	5	32569_AT,41153_F_AT,1922_G_AT,1742_AT,41137_AT,2057_G_AT,39145_AT,32026_S_AT,527_AT,37517_AT,32582_AT,448_S_AT,38062_AT,31618_AT,38221_AT,39634_AT,1469_AT,38711_AT,37279_AT,32000_G_AT,35339_AT,32624_AT,39700_AT,32749_S_AT,36805_S_AT,35598_AT
1	!	0.0203	2617	204	51	0.25	0.019	GO:0009966	BP	3	regulation of signal transduction	4	32569_AT,33865_AT,33876_AT,39797_AT,41153_F_AT,1495_AT,33520_AT,1922_G_AT,1742_AT,37042_AT,2057_G_AT,38026_AT,484_AT,2066_AT,38644_AT,1652_AT,41445_AT,41856_AT,35112_AT,1709_G_AT,32026_S_AT,38526_AT,39423_F_AT,39346_AT,35756_AT,37680_AT,37517_AT,448_S_AT,1859_S_AT,31618_AT,39634_AT,36621_AT,755_AT,32531_AT,1276_G_AT,36946_AT,1469_AT,32000_G_AT,35365_AT,33007_AT,38205_AT,36159_S_AT,32624_AT,39700_…
1	!	0.00112	1637	204	40	0.196	0.024	GO:1902531	BP	3	regulation of intracellular signal transduction	5	32569_AT,33865_AT,39797_AT,33520_AT,1922_G_AT,1742_AT,37042_AT,2057_G_AT,38026_AT,2066_AT,38644_AT,1652_AT,41445_AT,41856_AT,1709_G_AT,32026_S_AT,38526_AT,39423_F_AT,37680_AT,37517_AT,448_S_AT,1859_S_AT,31618_AT,39634_AT,755_AT,32531_AT,36946_AT,1469_AT,32000_G_AT,35365_AT,33007_AT,38205_AT,36159_S_AT,32624_AT,39700_AT,38443_AT,32749_S_AT,36805_S_AT,41161_AT,41190_AT
1	!	0.00057	2117	204	48	0.235	0.023	GO:0050793	BP	3	regulation of developmental process	2	336_AT,32569_AT,33876_AT,41153_F_AT,38736_AT,36577_AT,2057_G_AT,38026_AT,484_AT,35177_AT,2066_AT,38644_AT,720_AT,40326_AT,41445_AT,32026_S_AT,36283_AT,36149_AT,37981_AT,32410_AT,40448_AT,33091_AT,39511_AT,35438_AT,37517_AT,41097_AT,37294_AT,448_S_AT,36659_AT,31618_AT,39634_AT,36621_AT,32531_AT,38711_AT,32000_G_AT,35365_AT,34355_AT,1915_S_AT,38205_AT,36423_AT,38443_AT,35324_AT,41382_AT,32749_S_AT,…
1	!	0.00887	1580	204	37	0.181	0.023	GO:2000026	BP	3	regulation of multicellular organismal development	3	336_AT,32569_AT,33876_AT,41153_F_AT,38736_AT,2057_G_AT,484_AT,2066_AT,40326_AT,41445_AT,32026_S_AT,36283_AT,36149_AT,37981_AT,32410_AT,40448_AT,33091_AT,39511_AT,35438_AT,37517_AT,37294_AT,36659_AT,31618_AT,39634_AT,36621_AT,32531_AT,38711_AT,35365_AT,34355_AT,1915_S_AT,38205_AT,36423_AT,35324_AT,41382_AT,36805_S_AT,34933_AT,38506_AT
1	!	0.0233	726	204	22	0.108	0.03	GO:0051960	BP	3	regulation of nervous system development	4	32569_AT,41153_F_AT,38736_AT,2057_G_AT,484_AT,40326_AT,41445_AT,32026_S_AT,36283_AT,36149_AT,37981_AT,39511_AT,35438_AT,37517_AT,31618_AT,39634_AT,38711_AT,35365_AT,34355_AT,38205_AT,35324_AT,36805_S_AT
1	!	0.0104	799	204	24	0.118	0.03	GO:0051093	BP	3	negative regulation of developmental process	3	32569_AT,33876_AT,41153_F_AT,2057_G_AT,38026_AT,41445_AT,32026_S_AT,36283_AT,36149_AT,40448_AT,35438_AT,37517_AT,41097_AT,448_S_AT,36659_AT,31618_AT,39634_AT,36621_AT,32531_AT,38711_AT,32000_G_AT,38205_AT,41161_AT,38506_AT
1	!	0.0372	1484	204	34	0.167	0.023	GO:0045595	BP	3	regulation of cell differentiation	3	32569_AT,33876_AT,41153_F_AT,38736_AT,2057_G_AT,38026_AT,484_AT,2066_AT,720_AT,41445_AT,32026_S_AT,36283_AT,36149_AT,37981_AT,32410_AT,40448_AT,39511_AT,35438_AT,37517_AT,37294_AT,448_S_AT,31618_AT,39634_AT,38711_AT,32000_G_AT,35365_AT,1915_S_AT,38205_AT,35324_AT,41382_AT,32749_S_AT,36805_S_AT,41161_AT,38506_AT
1	!	0.0013	815	204	26	0.127	0.032	GO:0060284	BP	3	regulation of cell development	4	32569_AT,33876_AT,41153_F_AT,38736_AT,2057_G_AT,38026_AT,484_AT,2066_AT,41445_AT,32026_S_AT,36283_AT,36149_AT,37981_AT,32410_AT,39511_AT,35438_AT,37517_AT,31618_AT,39634_AT,38711_AT,35365_AT,38205_AT,35324_AT,32749_S_AT,36805_S_AT,38506_AT
1	!	0.0356	636	204	20	0.098	0.031	GO:0050767	BP	3	regulation of neurogenesis	5	32569_AT,41153_F_AT,38736_AT,2057_G_AT,484_AT,41445_AT,32026_S_AT,36283_AT,36149_AT,37981_AT,39511_AT,35438_AT,37517_AT,31618_AT,39634_AT,38711_AT,35365_AT,38205_AT,35324_AT,36805_S_AT
1	!	0.0196	2325	204	47	0.23	0.02	GO:0032879	BP	3	regulation of localization	1	1419_G_AT,33876_AT,32542_AT,41153_F_AT,40527_AT,33520_AT,1922_G_AT,1742_AT,37042_AT,37628_AT,38736_AT,38026_AT,2066_AT,40817_AT,41445_AT,34906_G_AT,32026_S_AT,32242_AT,33017_AT,38526_AT,36149_AT,40474_R_AT,34457_AT,33418_AT,1782_S_AT,654_AT,39346_AT,938_AT,760_AT,35438_AT,31775_AT,31618_AT,38282_AT,39634_AT,36621_AT,755_AT,32531_AT,1276_G_AT,38711_AT,32000_G_AT,35365_AT,33007_AT,35339_AT,33891_AT…
1	!	0.0258	1723	204	38	0.186	0.022	GO:0051049	BP	3	regulation of transport	2	1419_G_AT,33876_AT,32542_AT,40527_AT,1922_G_AT,1742_AT,37042_AT,37628_AT,38736_AT,38026_AT,2066_AT,40817_AT,41445_AT,34906_G_AT,32242_AT,33017_AT,38526_AT,40474_R_AT,34457_AT,33418_AT,654_AT,39346_AT,938_AT,760_AT,31775_AT,31618_AT,36621_AT,755_AT,32531_AT,1276_G_AT,38711_AT,32000_G_AT,33007_AT,35339_AT,33891_AT,36159_S_AT,38443_AT,32749_S_AT
1	!	0.0145	1882	204	41	0.201	0.022	GO:0012501	BP	3	programmed cell death	1	33865_AT,41153_F_AT,1742_AT,37042_AT,2057_G_AT,484_AT,2066_AT,40359_AT,32045_AT,1652_AT,41445_AT,34906_G_AT,33442_AT,41856_AT,32026_S_AT,32242_AT,33017_AT,40474_R_AT,39423_F_AT,760_AT,37294_AT,1859_S_AT,31618_AT,39634_AT,32255_I_AT,755_AT,32531_AT,37732_AT,37972_AT,35365_AT,34355_AT,33891_AT,36159_S_AT,36423_AT,35324_AT,1992_AT,32749_S_AT,36805_S_AT,41161_AT,41190_AT,38506_AT
1	!	0.0113	1863	204	41	0.201	0.022	GO:0006915	BP	3	apoptotic process	2	33865_AT,41153_F_AT,1742_AT,37042_AT,2057_G_AT,484_AT,2066_AT,40359_AT,32045_AT,1652_AT,41445_AT,34906_G_AT,33442_AT,41856_AT,32026_S_AT,32242_AT,33017_AT,40474_R_AT,39423_F_AT,760_AT,37294_AT,1859_S_AT,31618_AT,39634_AT,32255_I_AT,755_AT,32531_AT,37732_AT,37972_AT,35365_AT,34355_AT,33891_AT,36159_S_AT,36423_AT,35324_AT,1992_AT,32749_S_AT,36805_S_AT,41161_AT,41190_AT,38506_AT
1	!	0.0484	32	204	5	0.025	0.156	GO:1902742	BP	3	apoptotic process involved in development	3	2066_AT,32242_AT,39634_AT,35324_AT,38506_AT
1	!	0.0188	2610	204	51	0.25	0.02	GO:0051246	BP	3	regulation of protein metabolic process	1	32569_AT,1419_G_AT,33865_AT,33876_AT,1922_G_AT,39110_AT,1742_AT,37042_AT,33907_AT,2057_G_AT,38026_AT,2066_AT,38644_AT,41445_AT,1709_G_AT,32026_S_AT,32242_AT,36283_AT,33017_AT,38526_AT,33418_AT,36650_AT,37318_AT,39346_AT,35756_AT,40448_AT,31775_AT,448_S_AT,1859_S_AT,31618_AT,39634_AT,36621_AT,32255_I_AT,35263_AT,32531_AT,1276_G_AT,36946_AT,1469_AT,35365_AT,33007_AT,34355_AT,35749_AT,36159_S_AT,364…
1	!	0.00411	167	204	11	0.054	0.066	GO:0030308	BP	3	negative regulation of cell growth	1	32542_AT,37042_AT,41445_AT,32242_AT,35438_AT,37294_AT,31618_AT,38282_AT,39634_AT,32531_AT,35324_AT
1	!	0.0283	2722	204	52	0.255	0.019	GO:0033036	BP	9	macromolecule localization	1	32569_AT,1419_G_AT,1775_AT,33876_AT,37049_G_AT,37418_AT,41153_F_AT,1495_AT,37042_AT,36577_AT,38026_AT,484_AT,2066_AT,41001_AT,39099_AT,40326_AT,40817_AT,41445_AT,34906_G_AT,32026_S_AT,33017_AT,37981_AT,40474_R_AT,527_AT,33418_AT,654_AT,39346_AT,35756_AT,938_AT,760_AT,37680_AT,41097_AT,1859_S_AT,31618_AT,32255_I_AT,755_AT,32531_AT,1276_G_AT,37230_AT,38711_AT,34507_S_AT,32000_G_AT,33007_AT,35339_AT…
1	!	0.00245	2364	204	50	0.245	0.021	GO:0008104	BP	9	protein localization	2	32569_AT,1419_G_AT,1775_AT,33876_AT,37049_G_AT,37418_AT,41153_F_AT,1495_AT,37042_AT,36577_AT,38026_AT,2066_AT,41001_AT,39099_AT,40326_AT,40817_AT,41445_AT,34906_G_AT,32026_S_AT,33017_AT,37981_AT,40474_R_AT,527_AT,33418_AT,654_AT,35756_AT,938_AT,760_AT,37680_AT,41097_AT,1859_S_AT,31618_AT,32255_I_AT,755_AT,32531_AT,1276_G_AT,37230_AT,38711_AT,34507_S_AT,32000_G_AT,33007_AT,35339_AT,34355_AT,38714_…
1	!	0.00257	2942	204	58	0.284	0.02	GO:0051641	BP	9	cellular localization	1	32569_AT,1419_G_AT,1775_AT,33876_AT,37049_G_AT,37418_AT,41153_F_AT,37042_AT,37628_AT,38736_AT,36577_AT,38026_AT,2066_AT,41001_AT,39099_AT,40326_AT,40817_AT,41445_AT,34906_G_AT,32026_S_AT,32242_AT,33017_AT,38526_AT,37981_AT,40474_R_AT,527_AT,33418_AT,654_AT,39346_AT,35756_AT,938_AT,760_AT,37680_AT,935_AT,41097_AT,1859_S_AT,31618_AT,33388_AT,40841_AT,32255_I_AT,755_AT,32531_AT,1276_G_AT,37360_AT,37…
1	!	0.0135	1479	204	35	0.172	0.024	GO:0070727	BP	9	cellular macromolecule localization	2	1775_AT,33876_AT,37049_G_AT,41153_F_AT,37042_AT,36577_AT,2066_AT,41001_AT,39099_AT,40817_AT,41445_AT,34906_G_AT,32026_S_AT,37981_AT,40474_R_AT,527_AT,33418_AT,654_AT,35756_AT,938_AT,760_AT,37680_AT,41097_AT,1859_S_AT,31618_AT,32255_I_AT,1276_G_AT,37230_AT,38711_AT,33007_AT,35339_AT,38714_AT,38443_AT,32749_S_AT,35255_AT
1	!	0.0117	1469	204	35	0.172	0.024	GO:0034613	BP	9	cellular protein localization	3	1775_AT,33876_AT,37049_G_AT,41153_F_AT,37042_AT,36577_AT,2066_AT,41001_AT,39099_AT,40817_AT,41445_AT,34906_G_AT,32026_S_AT,37981_AT,40474_R_AT,527_AT,33418_AT,654_AT,35756_AT,938_AT,760_AT,37680_AT,41097_AT,1859_S_AT,31618_AT,32255_I_AT,1276_G_AT,37230_AT,38711_AT,33007_AT,35339_AT,38714_AT,38443_AT,32749_S_AT,35255_AT
1	!	0.0249	785	204	23	0.113	0.029	GO:0061564	BP	6	axon development	1	32569_AT,41153_F_AT,1922_G_AT,1742_AT,2057_G_AT,39145_AT,41856_AT,32026_S_AT,36149_AT,1782_S_AT,35438_AT,935_AT,32239_AT,32582_AT,36659_AT,39634_AT,38711_AT,35365_AT,35339_AT,36159_S_AT,38443_AT,35324_AT,36805_S_AT
1	!	0.0445	757	204	22	0.108	0.029	GO:0007409	BP	6	axonogenesis	1	32569_AT,1922_G_AT,1742_AT,2057_G_AT,39145_AT,41856_AT,32026_S_AT,36149_AT,1782_S_AT,35438_AT,935_AT,32239_AT,32582_AT,36659_AT,39634_AT,38711_AT,35365_AT,35339_AT,36159_S_AT,38443_AT,35324_AT,36805_S_AT
1	!	0.0338	208	204	11	0.054	0.053	GO:0046822	BP	4	regulation of nucleocytoplasmic transport	1	33876_AT,37042_AT,41445_AT,40474_R_AT,654_AT,39346_AT,760_AT,1276_G_AT,33007_AT,38443_AT,32749_S_AT
1	!	0.000897	4854	204	84	0.412	0.017	GO:0032991	CC	8	macromolecular complex	1	32569_AT,36443_AT,1775_AT,33876_AT,39797_AT,41153_F_AT,1495_AT,40527_AT,39110_AT,1742_AT,1793_AT,38355_AT,37042_AT,38736_AT,36577_AT,33907_AT,2057_G_AT,31440_AT,34018_AT,35168_F_AT,484_AT,36952_AT,2066_AT,38644_AT,41001_AT,39099_AT,100_G_AT,39145_AT,34906_G_AT,39046_AT,35112_AT,34063_AT,32026_S_AT,36283_AT,38863_AT,36762_AT,38526_AT,36149_AT,527_AT,33418_AT,38230_AT,32303_AT,1782_S_AT,39639_S_AT,…
1	!	0.00116	4160	204	75	0.368	0.018	GO:0043234	CC	8	protein complex	2	32569_AT,36443_AT,1775_AT,33876_AT,39797_AT,41153_F_AT,1495_AT,40527_AT,39110_AT,1742_AT,1793_AT,37042_AT,38736_AT,36577_AT,33907_AT,2057_G_AT,31440_AT,34018_AT,35168_F_AT,36952_AT,2066_AT,38644_AT,41001_AT,39099_AT,100_G_AT,39145_AT,34906_G_AT,39046_AT,35112_AT,34063_AT,32026_S_AT,38863_AT,36762_AT,38526_AT,36149_AT,527_AT,33418_AT,38230_AT,32303_AT,1782_S_AT,39639_S_AT,36650_AT,37620_AT,39423_F…
1	!	5.47e-06	12822	204	173	0.848	0.013	GO:0043226	CC	7	organelle	1	336_AT,32569_AT,1419_G_AT,36443_AT,40592_AT,1775_AT,33865_AT,33876_AT,39225_AT,32542_AT,39797_AT,37049_G_AT,37418_AT,34849_AT,41153_F_AT,40527_AT,33520_AT,1793_AT,40074_AT,38355_AT,39175_AT,37042_AT,37628_AT,38736_AT,40089_AT,36577_AT,33472_AT,41137_AT,2057_G_AT,38026_AT,31440_AT,34018_AT,35168_F_AT,484_AT,36952_AT,35177_AT,2066_AT,38644_AT,41001_AT,40359_AT,40352_AT,39099_AT,32045_AT,32367_AT,39…
1	!	4.59e-06	3665	204	75	0.368	0.02	GO:0043228	CC	7	non-membrane-bounded organelle	2	32569_AT,1419_G_AT,36443_AT,1775_AT,33865_AT,39225_AT,41153_F_AT,38355_AT,38736_AT,40089_AT,36577_AT,41137_AT,484_AT,36952_AT,35177_AT,38644_AT,40359_AT,32045_AT,39145_AT,40817_AT,39046_AT,32242_AT,36283_AT,38863_AT,38526_AT,36149_AT,37981_AT,527_AT,33418_AT,32303_AT,1782_S_AT,39639_S_AT,36650_AT,654_AT,41738_AT,40448_AT,35330_AT,41191_AT,34203_AT,37680_AT,935_AT,37517_AT,41097_AT,32582_AT,448_S_…
1	!	0.00308	8052	204	119	0.583	0.015	GO:0044422	CC	7	organelle part	2	32569_AT,36443_AT,40592_AT,1775_AT,33865_AT,33876_AT,39225_AT,39797_AT,37049_G_AT,40527_AT,33520_AT,1793_AT,37042_AT,37628_AT,38736_AT,40089_AT,36577_AT,33472_AT,41137_AT,31440_AT,34018_AT,35168_F_AT,484_AT,36952_AT,35177_AT,2066_AT,38644_AT,41001_AT,40359_AT,39099_AT,32045_AT,39145_AT,720_AT,41488_AT,40817_AT,41445_AT,39046_AT,34063_AT,37664_AT,1709_G_AT,32242_AT,38863_AT,33017_AT,38526_AT,36149…
1	!	0.00058	11913	204	160	0.784	0.013	GO:0043227	CC	7	membrane-bounded organelle	2	336_AT,32569_AT,1419_G_AT,40592_AT,1775_AT,33865_AT,33876_AT,39225_AT,32542_AT,39797_AT,37049_G_AT,37418_AT,34849_AT,41153_F_AT,40527_AT,33520_AT,1793_AT,40074_AT,38355_AT,39175_AT,37042_AT,37628_AT,38736_AT,40089_AT,36577_AT,33472_AT,41137_AT,2057_G_AT,38026_AT,31440_AT,34018_AT,35168_F_AT,484_AT,36952_AT,35177_AT,2066_AT,38644_AT,41001_AT,40352_AT,39099_AT,32045_AT,32367_AT,720_AT,41488_AT,4081…
1	!	0.000278	16173	204	195	0.956	0.012	GO:0005623	CC	7	cell	1	336_AT,32569_AT,1419_G_AT,36443_AT,40592_AT,1775_AT,33865_AT,33876_AT,39225_AT,32542_AT,39797_AT,37049_G_AT,37418_AT,34849_AT,41153_F_AT,40527_AT,33520_AT,1922_G_AT,39110_AT,1742_AT,1793_AT,40074_AT,38355_AT,39175_AT,37042_AT,37628_AT,38736_AT,40089_AT,36577_AT,33907_AT,33472_AT,41137_AT,2057_G_AT,31440_AT,34018_AT,35168_F_AT,484_AT,36952_AT,35177_AT,2066_AT,38644_AT,41001_AT,40359_AT,40352_AT,39…
1	!	0.000191	16134	204	195	0.956	0.012	GO:0044464	CC	7	cell part	1	336_AT,32569_AT,1419_G_AT,36443_AT,40592_AT,1775_AT,33865_AT,33876_AT,39225_AT,32542_AT,39797_AT,37049_G_AT,37418_AT,34849_AT,41153_F_AT,40527_AT,33520_AT,1922_G_AT,39110_AT,1742_AT,1793_AT,40074_AT,38355_AT,39175_AT,37042_AT,37628_AT,38736_AT,40089_AT,36577_AT,33907_AT,33472_AT,41137_AT,2057_G_AT,31440_AT,34018_AT,35168_F_AT,484_AT,36952_AT,35177_AT,2066_AT,38644_AT,41001_AT,40359_AT,40352_AT,39…
1	!	3.3e-06	14007	204	183	0.897	0.013	GO:0005622	CC	7	intracellular	2	336_AT,32569_AT,1419_G_AT,36443_AT,40592_AT,1775_AT,33865_AT,33876_AT,39225_AT,32542_AT,39797_AT,37049_G_AT,37418_AT,34849_AT,41153_F_AT,40527_AT,33520_AT,1922_G_AT,39110_AT,1742_AT,1793_AT,40074_AT,38355_AT,39175_AT,37042_AT,37628_AT,38736_AT,40089_AT,36577_AT,33907_AT,33472_AT,41137_AT,2057_G_AT,31440_AT,34018_AT,35168_F_AT,484_AT,36952_AT,35177_AT,2066_AT,38644_AT,41001_AT,40359_AT,40352_AT,39…
1	!	2.73e-07	13616	204	182	0.892	0.013	GO:0044424	CC	7	intracellular part	3	336_AT,32569_AT,1419_G_AT,36443_AT,40592_AT,1775_AT,33865_AT,33876_AT,39225_AT,32542_AT,39797_AT,37049_G_AT,37418_AT,34849_AT,41153_F_AT,40527_AT,33520_AT,1922_G_AT,39110_AT,1793_AT,40074_AT,38355_AT,39175_AT,37042_AT,37628_AT,38736_AT,40089_AT,36577_AT,33907_AT,33472_AT,41137_AT,2057_G_AT,31440_AT,34018_AT,35168_F_AT,484_AT,36952_AT,35177_AT,2066_AT,38644_AT,41001_AT,40359_AT,40352_AT,39099_AT,1…
1	!	2.13e-05	10550	204	151	0.74	0.014	GO:0005737	CC	7	cytoplasm	4	336_AT,32569_AT,1419_G_AT,36443_AT,40592_AT,1775_AT,33876_AT,39225_AT,32542_AT,39797_AT,37049_G_AT,37418_AT,34849_AT,41153_F_AT,40527_AT,33520_AT,1922_G_AT,39110_AT,1793_AT,40074_AT,38355_AT,39175_AT,37042_AT,37628_AT,38736_AT,40089_AT,36577_AT,33907_AT,33472_AT,41137_AT,2057_G_AT,34018_AT,35168_F_AT,484_AT,36952_AT,35177_AT,2066_AT,38644_AT,41001_AT,40359_AT,39099_AT,100_G_AT,32045_AT,39145_AT,1…
1	!	0.00232	7922	204	118	0.578	0.015	GO:0044444	CC	7	cytoplasmic part	5	336_AT,32569_AT,1419_G_AT,36443_AT,40592_AT,33876_AT,39225_AT,32542_AT,37049_G_AT,34849_AT,41153_F_AT,40527_AT,33520_AT,1922_G_AT,39110_AT,1793_AT,40074_AT,38355_AT,39175_AT,37042_AT,37628_AT,38736_AT,36577_AT,33907_AT,33472_AT,41137_AT,2057_G_AT,34018_AT,35168_F_AT,36952_AT,35177_AT,2066_AT,38644_AT,41001_AT,39099_AT,100_G_AT,39145_AT,41488_AT,40817_AT,41445_AT,34906_G_AT,37664_AT,1709_G_AT,3202…
1	!	1.2e-05	3227	204	68	0.333	0.021	GO:0005829	CC	7	cytosol	6	336_AT,32569_AT,1419_G_AT,33876_AT,32542_AT,34849_AT,41153_F_AT,1922_G_AT,39110_AT,39175_AT,37042_AT,38736_AT,36577_AT,33907_AT,41137_AT,2057_G_AT,35177_AT,2066_AT,38644_AT,41001_AT,39099_AT,39145_AT,1709_G_AT,32026_S_AT,32242_AT,36283_AT,39263_AT,38526_AT,36149_AT,40474_R_AT,527_AT,38230_AT,1782_S_AT,36650_AT,37318_AT,41738_AT,35756_AT,40448_AT,35330_AT,39511_AT,37517_AT,32582_AT,448_S_AT,1859_S…
1	!	0.000331	226	204	14	0.069	0.062	GO:0005938	CC	7	cell cortex	6	32569_AT,1419_G_AT,36577_AT,38644_AT,37981_AT,41738_AT,35756_AT,37680_AT,935_AT,38221_AT,38711_AT,40468_AT,32749_S_AT,41161_AT
1	!	4.24e-06	11760	204	164	0.804	0.014	GO:0043229	CC	7	intracellular organelle	4	336_AT,32569_AT,1419_G_AT,36443_AT,40592_AT,1775_AT,33865_AT,33876_AT,39225_AT,32542_AT,39797_AT,37049_G_AT,37418_AT,34849_AT,41153_F_AT,40527_AT,33520_AT,1793_AT,40074_AT,38355_AT,39175_AT,37042_AT,37628_AT,38736_AT,40089_AT,36577_AT,33472_AT,41137_AT,2057_G_AT,31440_AT,34018_AT,35168_F_AT,484_AT,36952_AT,35177_AT,2066_AT,38644_AT,41001_AT,40359_AT,40352_AT,39099_AT,32045_AT,39145_AT,720_AT,4148…
1	!	4.59e-06	3665	204	75	0.368	0.02	GO:0043232	CC	7	intracellular non-membrane-bounded organelle	5	32569_AT,1419_G_AT,36443_AT,1775_AT,33865_AT,39225_AT,41153_F_AT,38355_AT,38736_AT,40089_AT,36577_AT,41137_AT,484_AT,36952_AT,35177_AT,38644_AT,40359_AT,32045_AT,39145_AT,40817_AT,39046_AT,32242_AT,36283_AT,38863_AT,38526_AT,36149_AT,37981_AT,527_AT,33418_AT,32303_AT,1782_S_AT,39639_S_AT,36650_AT,654_AT,41738_AT,40448_AT,35330_AT,41191_AT,34203_AT,37680_AT,935_AT,37517_AT,41097_AT,32582_AT,448_S_…
1	!	8.88e-05	1927	204	47	0.23	0.024	GO:0005856	CC	7	cytoskeleton	6	32569_AT,1419_G_AT,36443_AT,41153_F_AT,38736_AT,36577_AT,41137_AT,35177_AT,38644_AT,40359_AT,32045_AT,39145_AT,40817_AT,32242_AT,38526_AT,36149_AT,37981_AT,1782_S_AT,41738_AT,35330_AT,41191_AT,34203_AT,37680_AT,935_AT,37517_AT,32582_AT,39370_AT,40841_AT,32255_I_AT,34306_AT,32263_AT,37230_AT,1469_AT,38711_AT,37279_AT,35365_AT,35339_AT,33891_AT,35749_AT,40776_AT,39544_AT,40468_AT,32749_S_AT,34559_A…
1	!	0.0062	420	204	17	0.083	0.04	GO:0015629	CC	7	actin cytoskeleton	7	41153_F_AT,38736_AT,36577_AT,41137_AT,38644_AT,39145_AT,32242_AT,36149_AT,37981_AT,41738_AT,41191_AT,935_AT,32582_AT,35365_AT,33891_AT,32749_S_AT,32313_AT
1	!	0.00137	217	204	13	0.064	0.06	GO:0043292	CC	7	contractile fiber	6	36577_AT,41137_AT,39145_AT,32242_AT,38526_AT,41738_AT,35330_AT,41191_AT,32582_AT,35365_AT,40776_AT,39544_AT,32313_AT
1	!	0.0234	200	204	11	0.054	0.055	GO:0044449	CC	7	contractile fiber part	7	36577_AT,41137_AT,39145_AT,32242_AT,35330_AT,41191_AT,32582_AT,35365_AT,40776_AT,39544_AT,32313_AT
1	!	0.00505	206	204	12	0.059	0.058	GO:0030016	CC	7	myofibril	7	36577_AT,41137_AT,39145_AT,32242_AT,38526_AT,41738_AT,35330_AT,41191_AT,35365_AT,40776_AT,39544_AT,32313_AT
1	!	0.00241	7835	204	117	0.574	0.015	GO:0044446	CC	7	intracellular organelle part	5	32569_AT,36443_AT,40592_AT,1775_AT,33865_AT,33876_AT,39225_AT,39797_AT,37049_G_AT,40527_AT,33520_AT,1793_AT,37042_AT,37628_AT,38736_AT,40089_AT,36577_AT,33472_AT,41137_AT,31440_AT,34018_AT,35168_F_AT,484_AT,36952_AT,35177_AT,2066_AT,38644_AT,41001_AT,40359_AT,39099_AT,32045_AT,39145_AT,720_AT,41488_AT,40817_AT,41445_AT,39046_AT,34063_AT,37664_AT,1709_G_AT,32242_AT,38863_AT,33017_AT,38526_AT,36149…
1	!	5.34e-05	1401	204	39	0.191	0.028	GO:0044430	CC	7	cytoskeletal part	6	32569_AT,36443_AT,38736_AT,36577_AT,35177_AT,38644_AT,40359_AT,32045_AT,39145_AT,32242_AT,38526_AT,36149_AT,37981_AT,1782_S_AT,41738_AT,41191_AT,935_AT,37517_AT,32582_AT,39370_AT,40841_AT,32255_I_AT,34306_AT,32263_AT,37230_AT,1469_AT,38711_AT,37279_AT,35365_AT,35339_AT,33891_AT,35749_AT,40776_AT,39544_AT,32749_S_AT,34559_AT,32313_AT,41161_AT,348_AT
1	!	0.038	51	204	6	0.029	0.118	GO:0032432	CC	7	actin filament bundle	7	36577_AT,38644_AT,39145_AT,32242_AT,35365_AT,32749_S_AT
1	!	0.00266	10751	204	147	0.721	0.014	GO:0043231	CC	7	intracellular membrane-bounded organelle	5	336_AT,32569_AT,1419_G_AT,40592_AT,1775_AT,33865_AT,33876_AT,39225_AT,32542_AT,39797_AT,37049_G_AT,37418_AT,34849_AT,41153_F_AT,40527_AT,33520_AT,1793_AT,40074_AT,38355_AT,39175_AT,37042_AT,37628_AT,40089_AT,36577_AT,33472_AT,41137_AT,2057_G_AT,31440_AT,34018_AT,35168_F_AT,484_AT,36952_AT,35177_AT,2066_AT,38644_AT,41001_AT,40352_AT,39099_AT,32045_AT,720_AT,41488_AT,40817_AT,41445_AT,34906_G_AT,39…
1	!	0.00777	6816	204	104	0.51	0.015	GO:0005634	CC	7	nucleus	6	32569_AT,1419_G_AT,1775_AT,33865_AT,33876_AT,39225_AT,32542_AT,39797_AT,37049_G_AT,37418_AT,1793_AT,38355_AT,39175_AT,37042_AT,40089_AT,36577_AT,41137_AT,2057_G_AT,31440_AT,484_AT,2066_AT,38644_AT,40352_AT,32045_AT,720_AT,41488_AT,40817_AT,41445_AT,39046_AT,35112_AT,34063_AT,37664_AT,1709_G_AT,32242_AT,39263_AT,38863_AT,40474_R_AT,527_AT,38230_AT,32303_AT,39639_S_AT,36650_AT,654_AT,37620_AT,39423…
1	!	0.00292	1138	204	31	0.152	0.027	GO:0030054	CC	1	cell junction	1	32542_AT,41153_F_AT,38736_AT,36577_AT,38644_AT,41001_AT,40326_AT,34906_G_AT,32026_S_AT,36762_AT,37981_AT,34457_AT,35330_AT,41191_AT,34203_AT,39511_AT,35438_AT,37680_AT,935_AT,32662_AT,38221_AT,37875_AT,38282_AT,41195_AT,32531_AT,35365_AT,33891_AT,40776_AT,39544_AT,32749_S_AT,37968_AT
1	!	0.00198	477	204	19	0.093	0.04	GO:0070161	CC	1	anchoring junction	2	32542_AT,41153_F_AT,36577_AT,38644_AT,35330_AT,41191_AT,34203_AT,39511_AT,37680_AT,935_AT,32662_AT,38282_AT,41195_AT,32531_AT,35365_AT,40776_AT,39544_AT,32749_S_AT,37968_AT
1	!	0.00111	459	204	19	0.093	0.041	GO:0005912	CC	1	adherens junction	3	32542_AT,41153_F_AT,36577_AT,38644_AT,35330_AT,41191_AT,34203_AT,39511_AT,37680_AT,935_AT,32662_AT,38282_AT,41195_AT,32531_AT,35365_AT,40776_AT,39544_AT,32749_S_AT,37968_AT
1	!	8.76e-06	14243	204	184	0.902	0.013	GO:0005488	MF	2	binding	1	336_AT,32569_AT,1419_G_AT,36443_AT,40592_AT,1775_AT,33865_AT,33876_AT,39225_AT,32542_AT,39797_AT,37049_G_AT,37418_AT,34849_AT,41153_F_AT,1495_AT,40527_AT,33520_AT,1922_G_AT,39110_AT,1742_AT,1793_AT,40074_AT,38355_AT,39175_AT,37042_AT,37628_AT,38736_AT,40089_AT,36577_AT,33907_AT,33472_AT,41137_AT,2057_G_AT,38026_AT,31440_AT,34018_AT,35168_F_AT,484_AT,36952_AT,35177_AT,2066_AT,38644_AT,41001_AT,403…
1	!	3.06e-06	1377	204	41	0.201	0.03	GO:0044877	MF	2	macromolecular complex binding	2	32569_AT,33865_AT,41153_F_AT,39175_AT,2057_G_AT,38026_AT,35168_F_AT,484_AT,36952_AT,2066_AT,38644_AT,41001_AT,35112_AT,34063_AT,32242_AT,527_AT,37318_AT,39346_AT,32410_AT,35330_AT,33091_AT,41097_AT,32582_AT,448_S_AT,39370_AT,31618_AT,38282_AT,32255_I_AT,38711_AT,38786_AT,35365_AT,34355_AT,1915_S_AT,36159_S_AT,36423_AT,32897_AT,38443_AT,39544_AT,32749_S_AT,348_AT,38506_AT
1	!	8.62e-12	10688	204	166	0.814	0.016	GO:0005515	MF	2	protein binding	2	336_AT,32569_AT,1419_G_AT,1775_AT,33865_AT,33876_AT,39225_AT,32542_AT,39797_AT,37049_G_AT,37418_AT,41153_F_AT,1495_AT,40527_AT,33520_AT,1922_G_AT,39110_AT,1742_AT,1793_AT,39175_AT,37042_AT,37628_AT,38736_AT,36577_AT,41137_AT,2057_G_AT,38026_AT,31440_AT,34018_AT,35168_F_AT,484_AT,36952_AT,2066_AT,38644_AT,41001_AT,40359_AT,39099_AT,100_G_AT,32367_AT,39145_AT,1652_AT,720_AT,40326_AT,40817_AT,41445_…
1	!	0.000314	809	204	27	0.132	0.033	GO:0008092	MF	2	cytoskeletal protein binding	3	32569_AT,41153_F_AT,38736_AT,38644_AT,39145_AT,32242_AT,37981_AT,1782_S_AT,41738_AT,35756_AT,35330_AT,41191_AT,34203_AT,935_AT,32582_AT,39370_AT,32255_I_AT,36946_AT,38711_AT,34507_S_AT,35339_AT,36159_S_AT,40776_AT,39544_AT,32749_S_AT,32313_AT,348_AT
1	!	0.01	1208	204	31	0.152	0.026	GO:0042802	MF	2	identical protein binding	3	32569_AT,1419_G_AT,33876_AT,1742_AT,37628_AT,2057_G_AT,38026_AT,2066_AT,40326_AT,41445_AT,34906_G_AT,32242_AT,39346_AT,35756_AT,33756_AT,41097_AT,1859_S_AT,31618_AT,39634_AT,32255_I_AT,36946_AT,38714_AT,36159_S_AT,40776_AT,40468_AT,1992_AT,32749_S_AT,36805_S_AT,41161_AT,37968_AT,38506_AT
1	!	0.000619	1174	204	33	0.162	0.028	GO:0046983	MF	2	protein dimerization activity	3	32569_AT,1419_G_AT,1775_AT,33876_AT,1742_AT,37628_AT,2057_G_AT,484_AT,2066_AT,40326_AT,41445_AT,39046_AT,32242_AT,527_AT,38230_AT,654_AT,37620_AT,32410_AT,35756_AT,33756_AT,41097_AT,31618_AT,39634_AT,32255_I_AT,38714_AT,38205_AT,32624_AT,32749_S_AT,36805_S_AT,41161_AT,37968_AT,35598_AT,38506_AT
1	!	0.0142	1679	204	38	0.186	0.023	GO:0019899	MF	2	enzyme binding	3	32569_AT,40527_AT,37042_AT,41137_AT,484_AT,38644_AT,41001_AT,100_G_AT,720_AT,41445_AT,34063_AT,38863_AT,38526_AT,33418_AT,38230_AT,32303_AT,36650_AT,39423_F_AT,40448_AT,39511_AT,37680_AT,37294_AT,1859_S_AT,39370_AT,31618_AT,38711_AT,32000_G_AT,35365_AT,35339_AT,34355_AT,38443_AT,41382_AT,1992_AT,32749_S_AT,648_AT,36805_S_AT,41161_AT,35255_AT
1	!	0.000152	885	204	29	0.142	0.033	GO:0032403	MF	2	protein complex binding	3	32569_AT,41153_F_AT,39175_AT,2057_G_AT,38026_AT,35168_F_AT,484_AT,36952_AT,2066_AT,38644_AT,41001_AT,35112_AT,34063_AT,32242_AT,39346_AT,35330_AT,32582_AT,39370_AT,38282_AT,32255_I_AT,38711_AT,35365_AT,36159_S_AT,32897_AT,38443_AT,39544_AT,32749_S_AT,348_AT,38506_AT
1	!	0.0414	27	204	5	0.025	0.185	HP:0003691	hp	11	Scapular winging	1	32542_AT,40776_AT,38443_AT,32749_S_AT,32313_AT
1	!	0.0379	139	204	10	0.049	0.072	HP:0000306	hp	5	Abnormality of the chin	1	40592_AT,2057_G_AT,41445_AT,38526_AT,32531_AT,1915_S_AT,38443_AT,32749_S_AT,32313_AT,38506_AT
1	!	0.0105	95	204	9	0.044	0.095	HP:0000303	hp	5	Mandibular prognathia	2	40592_AT,2057_G_AT,41445_AT,38526_AT,32531_AT,1915_S_AT,38443_AT,32313_AT,38506_AT

## Sheet: p<0
#	signf	p-value	T	Q	Q&T	Q&T/Q	Q&T/T	term ID	t type	t group	t name	t depth	Q&T list
#
1	!	0.0492	11	108	3	0.028	0.273	GO:0060484	BP	7	lung-associated mesenchyme development	1	2056_AT,2030_AT,1616_AT
1	!	0.0335	99	108	6	0.056	0.061	GO:0072091	BP	3	regulation of stem cell proliferation	1	1008_F_AT,2056_AT,2030_AT,1616_AT,34148_AT,32284_AT
1	!	0.00756	763	108	16	0.148	0.021	GO:0006325	BP	6	chromatin organization	1	32474_AT,32654_G_AT,36576_AT,39866_AT,1863_S_AT,41316_S_AT,36592_AT,33931_AT,1728_AT,41841_AT,41399_AT,33360_AT,1643_G_AT,319_G_AT,39117_AT,36209_AT
1	!	0.0495	283	108	9	0.083	0.032	GO:0000377	BP	4	RNA splicing, via transesterification reactions with bulged adenosine as nucleophile	1	1556_AT,39180_AT,33543_S_AT,36153_AT,38527_AT,41292_AT,34305_AT,41183_AT,35745_F_AT
1	!	0.014	6881	108	60	0.556	0.009	GO:0006807	BP	4	nitrogen compound metabolic process	1	1556_AT,40869_AT,32474_AT,1008_F_AT,39330_S_AT,37676_AT,37675_AT,2056_AT,1644_AT,2030_AT,41836_AT,37448_S_AT,38122_AT,39180_AT,40506_S_AT,32171_AT,33543_S_AT,1616_AT,38860_AT,39112_AT,39024_AT,32654_G_AT,39435_AT,36576_AT,1396_AT,240_AT,32303_AT,39866_AT,40845_AT,34652_AT,40790_AT,36153_AT,34148_AT,33218_AT,36702_AT,40946_AT,38527_AT,40835_AT,1863_S_AT,39097_AT,41316_S_AT,37292_AT,36026_AT,36592_…
1	!	0.00655	6570	108	59	0.546	0.009	GO:0034641	BP	4	cellular nitrogen compound metabolic process	2	1556_AT,40869_AT,32474_AT,1008_F_AT,39330_S_AT,37676_AT,37675_AT,2056_AT,1644_AT,2030_AT,41836_AT,37448_S_AT,38122_AT,39180_AT,40506_S_AT,32171_AT,33543_S_AT,1616_AT,38860_AT,39112_AT,39024_AT,32654_G_AT,39435_AT,36576_AT,1396_AT,240_AT,32303_AT,39866_AT,40845_AT,34652_AT,40790_AT,36153_AT,34148_AT,33218_AT,36702_AT,40946_AT,38527_AT,40835_AT,1863_S_AT,39097_AT,41316_S_AT,37292_AT,36026_AT,36592_…
1	!	0.0344	4317	108	43	0.398	0.01	GO:0051171	BP	4	regulation of nitrogen compound metabolic process	2	1556_AT,32474_AT,1008_F_AT,39330_S_AT,37676_AT,2056_AT,1644_AT,2030_AT,37448_S_AT,39180_AT,32171_AT,33543_S_AT,1616_AT,39112_AT,32654_G_AT,39435_AT,36576_AT,1396_AT,32303_AT,39866_AT,40845_AT,34652_AT,40790_AT,34148_AT,33218_AT,36702_AT,38527_AT,39097_AT,41316_S_AT,37292_AT,36026_AT,36592_AT,1728_AT,41302_AT,41292_AT,41841_AT,41399_AT,33360_AT,1643_G_AT,32284_AT,35477_AT,39117_AT,36209_AT
1	!	0.0483	6113	108	54	0.5	0.009	GO:1901360	BP	4	organic cyclic compound metabolic process	1	1556_AT,40869_AT,32474_AT,1008_F_AT,39330_S_AT,37676_AT,2056_AT,2030_AT,41836_AT,37448_S_AT,38122_AT,39180_AT,40506_S_AT,33543_S_AT,1616_AT,38860_AT,39112_AT,39024_AT,32654_G_AT,39435_AT,36576_AT,32303_AT,39866_AT,40845_AT,34652_AT,40790_AT,36153_AT,34148_AT,33218_AT,36702_AT,40946_AT,38527_AT,40835_AT,1863_S_AT,39097_AT,41316_S_AT,37292_AT,36026_AT,36592_AT,1728_AT,41302_AT,41292_AT,34305_AT,418…
1	!	0.014	5881	108	54	0.5	0.009	GO:0046483	BP	4	heterocycle metabolic process	1	1556_AT,40869_AT,32474_AT,1008_F_AT,39330_S_AT,37676_AT,2056_AT,2030_AT,41836_AT,37448_S_AT,38122_AT,39180_AT,40506_S_AT,33543_S_AT,1616_AT,38860_AT,39112_AT,39024_AT,32654_G_AT,39435_AT,36576_AT,32303_AT,39866_AT,40845_AT,34652_AT,40790_AT,36153_AT,34148_AT,33218_AT,36702_AT,40946_AT,38527_AT,40835_AT,1863_S_AT,39097_AT,41316_S_AT,37292_AT,36026_AT,36592_AT,1728_AT,41302_AT,41292_AT,34305_AT,418…
1	!	0.0152	5895	108	54	0.5	0.009	GO:0006725	BP	4	cellular aromatic compound metabolic process	1	1556_AT,40869_AT,32474_AT,1008_F_AT,39330_S_AT,37676_AT,2056_AT,2030_AT,41836_AT,37448_S_AT,38122_AT,39180_AT,40506_S_AT,33543_S_AT,1616_AT,38860_AT,39112_AT,39024_AT,32654_G_AT,39435_AT,36576_AT,32303_AT,39866_AT,40845_AT,34652_AT,40790_AT,36153_AT,34148_AT,33218_AT,36702_AT,40946_AT,38527_AT,40835_AT,1863_S_AT,39097_AT,41316_S_AT,37292_AT,36026_AT,36592_AT,1728_AT,41302_AT,41292_AT,34305_AT,418…
1	!	0.00501	5700	108	54	0.5	0.009	GO:0006139	BP	4	nucleobase-containing compound metabolic process	2	1556_AT,40869_AT,32474_AT,1008_F_AT,39330_S_AT,37676_AT,2056_AT,2030_AT,41836_AT,37448_S_AT,38122_AT,39180_AT,40506_S_AT,33543_S_AT,1616_AT,38860_AT,39112_AT,39024_AT,32654_G_AT,39435_AT,36576_AT,32303_AT,39866_AT,40845_AT,34652_AT,40790_AT,36153_AT,34148_AT,33218_AT,36702_AT,40946_AT,38527_AT,40835_AT,1863_S_AT,39097_AT,41316_S_AT,37292_AT,36026_AT,36592_AT,1728_AT,41302_AT,41292_AT,34305_AT,418…
1	!	0.00248	5111	108	51	0.472	0.01	GO:0090304	BP	4	nucleic acid metabolic process	3	1556_AT,40869_AT,32474_AT,1008_F_AT,39330_S_AT,37676_AT,2056_AT,2030_AT,41836_AT,37448_S_AT,39180_AT,40506_S_AT,33543_S_AT,1616_AT,39112_AT,39024_AT,32654_G_AT,39435_AT,36576_AT,32303_AT,39866_AT,40845_AT,34652_AT,40790_AT,36153_AT,34148_AT,33218_AT,36702_AT,40946_AT,38527_AT,40835_AT,1863_S_AT,39097_AT,41316_S_AT,37292_AT,36592_AT,1728_AT,41302_AT,41292_AT,34305_AT,41841_AT,41399_AT,33360_AT,411…
1	!	0.000616	4597	108	49	0.454	0.011	GO:0016070	BP	4	RNA metabolic process	4	1556_AT,40869_AT,32474_AT,1008_F_AT,39330_S_AT,37676_AT,2056_AT,2030_AT,41836_AT,39180_AT,40506_S_AT,33543_S_AT,1616_AT,39112_AT,39024_AT,32654_G_AT,39435_AT,36576_AT,32303_AT,39866_AT,40845_AT,34652_AT,40790_AT,36153_AT,34148_AT,33218_AT,36702_AT,38527_AT,40835_AT,1863_S_AT,39097_AT,41316_S_AT,37292_AT,36592_AT,1728_AT,41302_AT,41292_AT,34305_AT,41841_AT,41399_AT,33360_AT,41183_AT,1643_G_AT,3228…
1	!	0.000808	5404	108	54	0.5	0.01	GO:0010467	BP	4	gene expression	1	1556_AT,40869_AT,32474_AT,1008_F_AT,33325_AT,37676_AT,37675_AT,2056_AT,1644_AT,2030_AT,41836_AT,37448_S_AT,39180_AT,40506_S_AT,32171_AT,33543_S_AT,1616_AT,39112_AT,39024_AT,32654_G_AT,39435_AT,36576_AT,1396_AT,32303_AT,39866_AT,40845_AT,34652_AT,40790_AT,36153_AT,34148_AT,33218_AT,36702_AT,38527_AT,40835_AT,1863_S_AT,39097_AT,41316_S_AT,37292_AT,36592_AT,1728_AT,41302_AT,41292_AT,34305_AT,41841_A…
1	!	0.00397	816	108	17	0.157	0.021	GO:0006396	BP	4	RNA processing	2	1556_AT,40869_AT,41836_AT,39180_AT,40506_S_AT,33543_S_AT,39024_AT,36153_AT,38527_AT,40835_AT,39097_AT,41302_AT,41292_AT,34305_AT,41183_AT,35745_F_AT,39405_AT
1	!	0.0127	4305	108	44	0.407	0.01	GO:0010468	BP	4	regulation of gene expression	1	1556_AT,32474_AT,1008_F_AT,33325_AT,37676_AT,2056_AT,1644_AT,2030_AT,37448_S_AT,32171_AT,33543_S_AT,1616_AT,39112_AT,39024_AT,32654_G_AT,39435_AT,36576_AT,1396_AT,32303_AT,39866_AT,40845_AT,34652_AT,40790_AT,36153_AT,34148_AT,33218_AT,36702_AT,38527_AT,1863_S_AT,39097_AT,41316_S_AT,37292_AT,36592_AT,1728_AT,41302_AT,41292_AT,41841_AT,41399_AT,33360_AT,1643_G_AT,32284_AT,35477_AT,39117_AT,36209_AT
1	!	0.0136	453	108	12	0.111	0.026	GO:0006397	BP	4	mRNA processing	1	1556_AT,39180_AT,33543_S_AT,36153_AT,38527_AT,40835_AT,39097_AT,41302_AT,41292_AT,34305_AT,41183_AT,35745_F_AT
1	!	0.0495	283	108	9	0.083	0.032	GO:0000398	BP	4	mRNA splicing, via spliceosome	2	1556_AT,39180_AT,33543_S_AT,36153_AT,38527_AT,41292_AT,34305_AT,41183_AT,35745_F_AT
1	!	0.00393	6816	108	61	0.565	0.009	GO:0005634	CC	1	nucleus	1	1556_AT,40869_AT,32474_AT,1008_F_AT,33325_AT,37675_AT,2056_AT,37448_S_AT,39180_AT,40506_S_AT,33543_S_AT,39112_AT,39024_AT,32654_G_AT,36576_AT,37226_AT,31536_AT,32303_AT,34169_S_AT,39866_AT,40845_AT,34652_AT,33885_AT,40790_AT,36153_AT,40988_AT,329_S_AT,34148_AT,33218_AT,36702_AT,40946_AT,38527_AT,33120_AT,40835_AT,1863_S_AT,39295_S_AT,39097_AT,41316_S_AT,37292_AT,36026_AT,36592_AT,33931_AT,1728_AT…
1	!	0.0402	3752	108	39	0.361	0.01	GO:0044428	CC	1	nuclear part	2	1556_AT,33325_AT,37675_AT,39180_AT,33543_S_AT,39112_AT,39024_AT,32654_G_AT,36576_AT,37226_AT,31536_AT,32303_AT,39866_AT,40845_AT,40790_AT,36153_AT,40988_AT,329_S_AT,40946_AT,38527_AT,40835_AT,1863_S_AT,39097_AT,41316_S_AT,37292_AT,36592_AT,33931_AT,1728_AT,41292_AT,34305_AT,41399_AT,33360_AT,41183_AT,39240_AT,1643_G_AT,319_G_AT,35745_F_AT,39117_AT,39405_AT
1	!	0.00763	5935	108	55	0.509	0.009	GO:1901363	MF	2	heterocyclic compound binding	1	1556_AT,40869_AT,32474_AT,242_AT,1008_F_AT,33325_AT,39330_S_AT,40826_AT,2056_AT,1644_AT,2030_AT,41836_AT,37448_S_AT,39180_AT,40506_S_AT,32171_AT,33543_S_AT,39112_AT,36576_AT,32085_AT,31536_AT,32303_AT,35242_AT,32508_AT,37415_AT,40845_AT,34652_AT,33885_AT,40790_AT,36153_AT,40988_AT,34148_AT,33218_AT,36702_AT,40946_AT,919_AT,38527_AT,40835_AT,1863_S_AT,39295_S_AT,39097_AT,41316_S_AT,36592_AT,41302_…
1	!	0.012	6016	108	55	0.509	0.009	GO:0097159	MF	2	organic cyclic compound binding	1	1556_AT,40869_AT,32474_AT,242_AT,1008_F_AT,33325_AT,39330_S_AT,40826_AT,2056_AT,1644_AT,2030_AT,41836_AT,37448_S_AT,39180_AT,40506_S_AT,32171_AT,33543_S_AT,39112_AT,36576_AT,32085_AT,31536_AT,32303_AT,35242_AT,32508_AT,37415_AT,40845_AT,34652_AT,33885_AT,40790_AT,36153_AT,40988_AT,34148_AT,33218_AT,36702_AT,40946_AT,919_AT,38527_AT,40835_AT,1863_S_AT,39295_S_AT,39097_AT,41316_S_AT,36592_AT,41302_…
1	!	0.00065	4019	108	45	0.417	0.011	GO:0003676	MF	2	nucleic acid binding	2	1556_AT,40869_AT,32474_AT,242_AT,1008_F_AT,39330_S_AT,1644_AT,2030_AT,41836_AT,39180_AT,40506_S_AT,32171_AT,33543_S_AT,39112_AT,36576_AT,31536_AT,32303_AT,32508_AT,40845_AT,34652_AT,33885_AT,40790_AT,36153_AT,34148_AT,36702_AT,40946_AT,38527_AT,40835_AT,1863_S_AT,39295_S_AT,39097_AT,41316_S_AT,36592_AT,41302_AT,41292_AT,34305_AT,33360_AT,41183_AT,41366_AT,1643_G_AT,32284_AT,319_G_AT,35477_AT,3574…
1	!	1.96e-06	1590	108	30	0.278	0.019	GO:0003723	MF	2	RNA binding	3	1556_AT,40869_AT,242_AT,1008_F_AT,39330_S_AT,1644_AT,41836_AT,39180_AT,40506_S_AT,32171_AT,33543_S_AT,31536_AT,32508_AT,40845_AT,33885_AT,36153_AT,40946_AT,38527_AT,40835_AT,39295_S_AT,39097_AT,41316_S_AT,41302_AT,41292_AT,34305_AT,41183_AT,41366_AT,319_G_AT,35745_F_AT,35618_AT
1	!	1.25e-06	1176	108	26	0.241	0.022	GO:0044822	MF	2	poly(A) RNA binding	4	1556_AT,40869_AT,242_AT,1008_F_AT,41836_AT,39180_AT,40506_S_AT,32171_AT,33543_S_AT,31536_AT,32508_AT,40845_AT,36153_AT,40946_AT,38527_AT,40835_AT,39295_S_AT,39097_AT,41316_S_AT,41292_AT,34305_AT,41183_AT,41366_AT,319_G_AT,35745_F_AT,35618_AT
1	!	0.00031	10688	108	84	0.778	0.008	GO:0005515	MF	5	protein binding	1	1556_AT,40869_AT,38402_AT,242_AT,1008_F_AT,33325_AT,39330_S_AT,40826_AT,37675_AT,2056_AT,1644_AT,2030_AT,41836_AT,37448_S_AT,39180_AT,40506_S_AT,38393_AT,32171_AT,1616_AT,38860_AT,39112_AT,40928_AT,39024_AT,32654_G_AT,39435_AT,36576_AT,37226_AT,32085_AT,31536_AT,1741_S_AT,1396_AT,40322_AT,240_AT,32303_AT,35242_AT,32508_AT,37415_AT,34169_S_AT,36962_AT,39866_AT,40845_AT,34652_AT,33885_AT,40790_AT,3…
1	!	0.000725	11	97	4	0.041	0.364	CORUM:3082	co	8	DGCR8 multiprotein complex	1	39180_AT,40845_AT,36153_AT,41292_AT
