# Supplementary material for: A Network Biology Approach Identifies Molecular Cross-Talk between Normal Prostate Epithelial and Prostate Carcinoma Cells
Source: PLoS Comput Biol. 2016 Apr 28;12(4):e1004884. doi: 10.1371/journal.pcbi.1004884 (PMC4849722; doi:10.1371/journal.pcbi.1004884)
Supplement: S8 Table — The table shows the correlation coefficients between CGH signal and gene expression for all polarized genes. Note that only nine genes show a statistically significant correlation at a p<0.01. (XLSX) [file pcbi.1004884.s017.xlsx]

## Sheet: Foglio1
Gene Name	Correlation	p-value
FLNC	-0.382213428745867	0.00039876134414295
DBN1	0.346800861139796	0.000987537495301338
FOS	-0.349052803482488	0.000987537495301338
PLXNA3	-0.349825351810845	0.000987537495301338
CTNNA1	0.327208289422598	0.0025080091828277
RAB8A	0.309682650527619	0.00550562589613072
ZMYND11	0.293613990306348	0.0108928599621561
FHL1	0.283815985480439	0.0147299540060106
STMN1	0.282448886791327	0.0147299540060106
IDS	0.273932395271821	0.016592702811942
PRNP	-0.277342816027234	0.016592702811942
FLNA	0.275000143668591	0.016592702811942
ACTN1	-0.271079605332351	0.0175016168424996
RYBP	0.268785841021807	0.0180723640960871
GATA2	0.266374627359534	0.0188409773661103
ETF1	0.249206000305391	0.0274358219216696
MLLT4	-0.249569839665071	0.0274358219216696
DIDO1	-0.250081481043597	0.0274358219216696
NCOA1	-0.250756340108835	0.0274358219216696
KRTAP26-1	-0.251765888425999	0.0274358219216696
PCTK3	-0.255889329362818	0.0274358219216696
PRKCI	-0.251481621857739	0.0274358219216696
HADHA	0.241420592888792	0.0364166943209784
KPNA1	-0.23707329266299	0.0413295296157724
AKAP7	-0.236301573104922	0.0413295296157724
LMTK2	-0.232343744797974	0.0466052957026097
PDE4D	0.230588362842574	0.0481265309713259
DPYSL3	0.223691473640891	0.0607709278986251
RFC5	0.220510233188239	0.0662753980465394
AHCYL1	-0.219375576397042	0.0668845721261847
AGPS	-0.212890653999118	0.0710070866316771
FAM102A	-0.213112046174453	0.0710070866316771
TSHB	-0.214513087714765	0.0710070866316771
BRD2	0.214328682226557	0.0710070866316771
WSB1	-0.215255444231625	0.0710070866316771
USF2	-0.215394931826225	0.0710070866316771
CNKSR1	0.206043963059667	0.0885749228528739
MARK3	0.204263727415955	0.0918898125855883
MAP4	-0.20136820055815	0.09915686305533
WBSCR22	-0.200108503923492	0.101027791275369
TNFRSF10C	-0.199216683746798	0.101668090790371
ILK	0.19448192615255	0.110856855501504
CLIC4	-0.193980625148876	0.110856855501504
RAP1B	-0.194206024329397	0.110856855501504
C9orf61	0.194219041684388	0.110856855501504
RTN4	0.191870285299418	0.116451481903837
GNA12	-0.190186478662228	0.120579083924705
GRIK5	0.187543340314157	0.128872813082387
SARS	0.184321988273742	0.140263324499287
CAP1	-0.18288957058668	0.142155316684293
BRD3	-0.182670100230331	0.142155316684293
CHERP	-0.180349408632735	0.150181271177884
RBM5	-0.178615875364039	0.155680587938407
GPLD1	0.174914044564761	0.168469641725309
ERBB2	-0.175020494814323	0.168469641725309
MBNL1	0.17245719838656	0.175371915133069
CNNM2	-0.172889334083398	0.175371915133069
MTX1	-0.167294661668403	0.201558649834596
DEFB4	-0.164135694070182	0.211274564225613
TPM2	-0.164900214153284	0.211274564225613
DDX51	-0.163567804739745	0.211274564225613
TGFB1	0.163460976782258	0.211274564225613
MEN1	-0.161663776897318	0.219151988909164
MAPKAPK2	-0.16085833196834	0.220841224788372
CCND2	0.158904012895412	0.225952115131033
FGFR1	-0.158478136523556	0.225952115131033
PDE8A	0.159351687544368	0.225952115131033
SIRPB1	0.157954935609227	0.225991786436905
PIM2	-0.155549326591805	0.236158673386308
PGAM2	0.154884988711047	0.236158673386308
BAT2D1	0.155328360664589	0.236158673386308
SLIT2	0.150382546129897	0.240612326871283
CALD1	0.153549940000497	0.240612326871283
DAXX	0.150455176669667	0.240612326871283
DDX5	-0.152331921211323	0.240612326871283
ZNF22	0.15159279453468	0.240612326871283
RPS6KA2	0.150913881620576	0.240612326871283
BMI1	0.151630885144927	0.240612326871283
MTA2	-0.150718343226033	0.240612326871283
HSF4	0.149484346481938	0.24354319640364
MAP1LC3B	0.148279009110147	0.248594252726446
ZNF79	0.146607304913253	0.254567758685768
PFDN1	-0.146504672095365	0.254567758685768
CTBP2	-0.145435688282624	0.258884042773184
VPS13B	-0.143831352354519	0.267055282348356
PALLD	-0.141301191318055	0.282226214140077
RAB3GAP1	0.14016559787408	0.284143968775703
FEZ1	0.14054879201832	0.284143968775703
GYPA	-0.13870174608448	0.291863107779264
RECQL5	0.137340053572773	0.298954787888326
CLASP2	0.136476102255323	0.302303733132835
KIAA0907	-0.134283339945148	0.316197024416579
TEX261	0.133844008864048	0.31629278016928
APOBEC3C	0.130657487929354	0.334233317885604
ZBTB7A	0.130371673167869	0.334233317885604
GOLGA2	-0.131157591345037	0.334233317885604
RASGRF1	-0.128534909823162	0.346123880272473
KHK	-0.127670012578215	0.346392090853502
KCNQ1	-0.127800353878037	0.346392090853502
SLC29A2	-0.125899980659443	0.358010052458078
MYH11	0.124923000764202	0.361787562974689
DYRK2	-0.123035567747064	0.361787562974689
RABGGTA	-0.124353838364312	0.361787562974689
KHDRBS1	0.123763882259827	0.361787562974689
LRRC15	0.123283239292041	0.361787562974689
UTP14C	-0.123571638983761	0.361787562974689
GARNL4	0.121579863355235	0.369244018205504
MED12	0.121386555083677	0.369244018205504
MATN2	-0.120295118953416	0.375371938570374
PTPN11	0.116820912350585	0.403215240439208
SLC25A3	-0.116247882643501	0.404874211435206
YPEL1	0.113642582283144	0.407566499832086
FBLN1	0.113792082684638	0.407566499832086
FMO4	-0.113792038055041	0.407566499832086
ILF3	-0.115427568736456	0.407566499832086
EXT1	0.114015285195534	0.407566499832086
DHX9	0.113767085925194	0.407566499832086
DES	-0.112648726667872	0.409784637802304
PAX7	0.112722815421096	0.409784637802304
RBPMS	0.110811134665392	0.415083101230291
POLA2	0.110591673852955	0.415083101230291
MLANA	-0.111236068669947	0.415083101230291
SON	0.111249549884193	0.415083101230291
DMBT1	0.110069706614538	0.416523621596316
CYP4F3	0.108580862974431	0.423963912568726
GIPC1	-0.108538851874953	0.423963912568726
MYOG	0.107994738988818	0.425663995474058
CENPA	0.106957422996168	0.431989672176683
MDM2	0.105394247629965	0.443371102766599
PABPC4	0.103439593687838	0.458744800366426
NUP98	0.101895789820872	0.470364405738097
BAT1	-0.101291981980131	0.472766201343428
CEACAM3	-0.100891674299625	0.473166136487746
AKAP12	-0.0988464547025909	0.490055558903597
ZFP36	0.0963394507792647	0.509015885777442
TNP1	0.0962744733497217	0.509015885777442
MAPK10	-0.0952323820787028	0.512359604861788
KIAA0247	-0.0953476484786805	0.512359604861788
YBX1	0.0931308097161438	0.530615857965841
YME1L1	0.0923801226316186	0.534761840301907
ARHGAP1	-0.0916708756389322	0.538488330110877
COL19A1	-0.0909827193527424	0.542008957787015
WDR1	0.0896230913242982	0.548925074976628
RPH3A	0.0899690315641241	0.548925074976628
GJA1	-0.0888384176597118	0.549744632799153
NEUROD2	-0.0889469077094471	0.549744632799153
MAN2A2	0.0883941703650752	0.550731826942069
SAFB	-0.0873932928245531	0.557688140530181
SFTPD	-0.0870397671497203	0.557724227338266
CCNB2	-0.0863646864154591	0.561221451506127
FRMPD4	-0.0855878714655482	0.565828901061677
GPR6	0.0834703730614465	0.57515854730984
TACC1	-0.0841710942392567	0.57515854730984
ETV3	-0.0840285496818162	0.57515854730984
GPR19	-0.0830120926914688	0.57515854730984
RGS10	0.0829952040675642	0.57515854730984
HSP90AB1	0.0826449467155314	0.575249150053444
DYRK1A	0.0816745559194401	0.582026167126049
PPP1R12B	0.0808267725906176	0.58383728657267
MXI1	-0.080904590963457	0.58383728657267
EPAS1	-0.079764663076911	0.584393253535679
DDX3X	-0.0798721365556582	0.584393253535679
MOAP1	-0.0803172218599077	0.584393253535679
EXOC3	-0.078173429570458	0.597921494783479
GEM	0.0772028651048547	0.599582285109961
DKFZP564O0823	-0.0770161244204884	0.599582285109961
PHF2	0.0771636787197149	0.599582285109961
SLC20A2	-0.0760212856634762	0.60128078175851
COL4A2	0.0758648007352336	0.60128078175851
MAML1	-0.0758784406442067	0.60128078175851
DRG2	-0.0749210292193292	0.604354695254494
TBX1	-0.0749515293933414	0.604354695254494
PCBP2	-0.0715177275310256	0.634148279387599
NPAS1	0.0718028798200993	0.634148279387599
TOMM34	-0.0704116987013636	0.639628829567055
FAM38A	0.0703573883562945	0.639628829567055
WWTR1	0.0687172278536671	0.654105918838435
AHSG	0.0678782415693219	0.656063443848795
TERF2	-0.0679389815486381	0.656063443848795
TADA3L	0.0673466670874449	0.658296889941417
FGF9	-0.0668253975104335	0.660422218949889
HTR7	-0.0663032912088994	0.662562812438435
F7	0.0658033917569761	0.664463332077932
GABRG2	-0.0634346198835029	0.666593557846432
H2AFV	-0.0649129749602795	0.666593557846432
CRYAB	0.063016114866182	0.666593557846432
VENTX	0.0637400480357251	0.666593557846432
SLC30A3	0.0638269818858526	0.666593557846432
TAF12	0.0636180361425605	0.666593557846432
IGFBP5	-0.0652539915378396	0.666593557846432
NONO	-0.0632213601350304	0.666593557846432
SEC23A	-0.0624379000867939	0.668864293500089
IFRD2	-0.0609076157224396	0.668864293500089
HOXD13	-0.0612371612807291	0.668864293500089
KLHL21	-0.0610941445336856	0.668864293500089
FHIT	-0.061859795554885	0.668864293500089
SORBS2	-0.0608988344198886	0.668864293500089
EIF2AK2	-0.060288472795364	0.672040460535093
FNBP1	-0.0591550592703009	0.678597805207764
HTR4	-0.0590496316006268	0.678597805207764
LPP	-0.0564141647024983	0.700905324100604
NTRK1	-0.0563600916751361	0.700905324100604
MYL9	0.0544751258111218	0.706591959892218
DDHD2	-0.0548359364253297	0.706591959892218
POU2F2	0.0543795185257493	0.706591959892218
CEP135	-0.0542547911390591	0.706591959892218
FAM89B	0.0546881113835065	0.706591959892218
NUCB1	0.0538146610319027	0.707948617694904
MTA1	-0.0531789593440944	0.711423498961417
IGFBP2	-0.0524817436972108	0.715565103398705
LAMP2	0.0519322286085305	0.71810835026779
PDE4C	-0.0506816139705568	0.722186137797238
H1FX	-0.0506132224770526	0.722186137797238
SIX3	-0.0509344682833429	0.722186137797238
EIF4EBP2	-0.0488184321659911	0.728047343332103
VDAC2	-0.048889124545814	0.728047343332103
TM4SF5	0.0490206785779831	0.728047343332103
ERBB3	0.0494274260310933	0.728047343332103
RASSF7	-0.0468672892195778	0.736057657678571
C9orf3	-0.0469481082814197	0.736057657678571
BAX	0.0471994070801081	0.736057657678571
DDX3Y	0.0468250461988641	0.736057657678571
LTBP1	0.0453134349052553	0.739112374844041
RGS9	0.0452989626071929	0.739112374844041
GARNL1	-0.0456974594878567	0.739112374844041
RBM6	0.0462163395884353	0.739112374844041
CNN1	0.0439321839874878	0.750334678855364
ITPR1	0.0433623825744133	0.753090901955888
MAOB	0.0424263805068856	0.759739699661998
SRM	-0.040186613184548	0.780344564783964
TBXA2R	-0.0387722591014217	0.792161734476466
DDX6	0.0381148638369047	0.795821282614458
BRD8	0.0369307275752398	0.805158181063303
DNAH9	0.0339774456313272	0.831885668621855
GPX4	0.0338215194196541	0.831885668621855
ABCA1	0.0327990605189303	0.839471746002726
MTHFD2	-0.0322793368074313	0.841574585610332
HYAL2	0.0296376764149648	0.86559002917316
MECP2	-0.0294180963338261	0.86559002917316
OAS2	-0.0283357594176409	0.873784433005859
PFKP	0.0272277388320822	0.876775212927598
ECE2	0.027424008159315	0.876775212927598
PHB	0.0267436301689382	0.876775212927598
COPA	0.026730133292659	0.876775212927598
DNASE1L3	0.0254955731127392	0.87935142043247
EIF4G3	-0.0261284459014585	0.87935142043247
CDC2L5	-0.0255237471835969	0.87935142043247
ADAM15	0.0242631961810044	0.883350447920054
TNFRSF25	0.0242501547622555	0.883350447920054
TBX19	0.0237961523410193	0.883350447920054
HELZ	0.0240451827170016	0.883350447920054
KIFC1	0.022469139093668	0.893928892062744
WNT11	0.0207588403567792	0.89813903227087
EIF5	-0.0206406623183495	0.89813903227087
NRXN1	0.0216692169230631	0.89813903227087
ATP4B	-0.0204309492951588	0.89813903227087
ATM	0.0204047769155524	0.89813903227087
NCR3	-0.0181120994716169	0.911643836676258
SPOP	0.018279305639416	0.911643836676258
BTG1	-0.0183782230149425	0.911643836676258
UBR2	0.0177381558679669	0.912043157580009
PAX9	-0.0166166626874004	0.92021286905436
DPM2	-0.015129113483198	0.932157275264768
SLC23A2	0.0145997512300447	0.934113716084999
FUS	-0.0127789125260307	0.949438030222331
U2AF1	-0.0123975393106328	0.949810229005778
CBLN1	0.0115258830642568	0.951673497024188
PNN	-0.0117716806007082	0.951673497024188
NUMA1	-0.00893021698397832	0.974766308066027
MYCL1	0.0082581234199704	0.974951949138023
OCRL	-0.00820727148722909	0.974951949138023
MTHFR	0.00732845350369387	0.980313676020689
LY6E	-0.00409762038780351	0.982302003773897
TP53	0.00450401324236182	0.982302003773897
HSPB1	-0.00569562003592803	0.982302003773897
RAP1GAP	0.00539972258421513	0.982302003773897
PMS2	-0.00463736148718162	0.982302003773897
BNIP1	0.00394708246448297	0.982302003773897
R3HDM2	0.00595029928448555	0.982302003773897
CSTF3	-0.0041399912033331	0.982302003773897
H2AFY	0.00645471415407613	0.982302003773897
PAFAH1B1	0.00354522527569167	0.98277776363325
GPA33	0.00167670453859359	0.984375854139951
COL16A1	0.0028330940504143	0.984375854139951
AOC3	0.00161245068507053	0.984375854139951
EIF4B	-0.00212264617848611	0.984375854139951
RNPS1	0.00242372174073176	0.984375854139951
